# Supplementary material for: Understanding the Effects of Self-Induced Anaerobic Fermentation on Coffee Beans Quality: Microbiological, Metabolic, and Sensory Studies
Source: MDPI journal article supplement (doi:10.3390/foods12010037), 2022-12-22
Supplement: s1 [file s1]

# Understanding the effects of self-induced anaerobic fermentation on coffee beans quality: microbiological, metabolic, and sensory studies

Alexander da Silva Vale<sup>1</sup>, Gabriel Balla<sup>1</sup>, Luiz Roberto Saldanha Rodrigues<sup>1</sup>, Dão Pedro de Carvalho Neto<sup>2</sup>, Carlos Ricardo Soccol<sup>1</sup>, Gilberto Vinícius de Melo Pereira<sup>1,\*</sup>

## Supplementary Material

### Supplementary Material

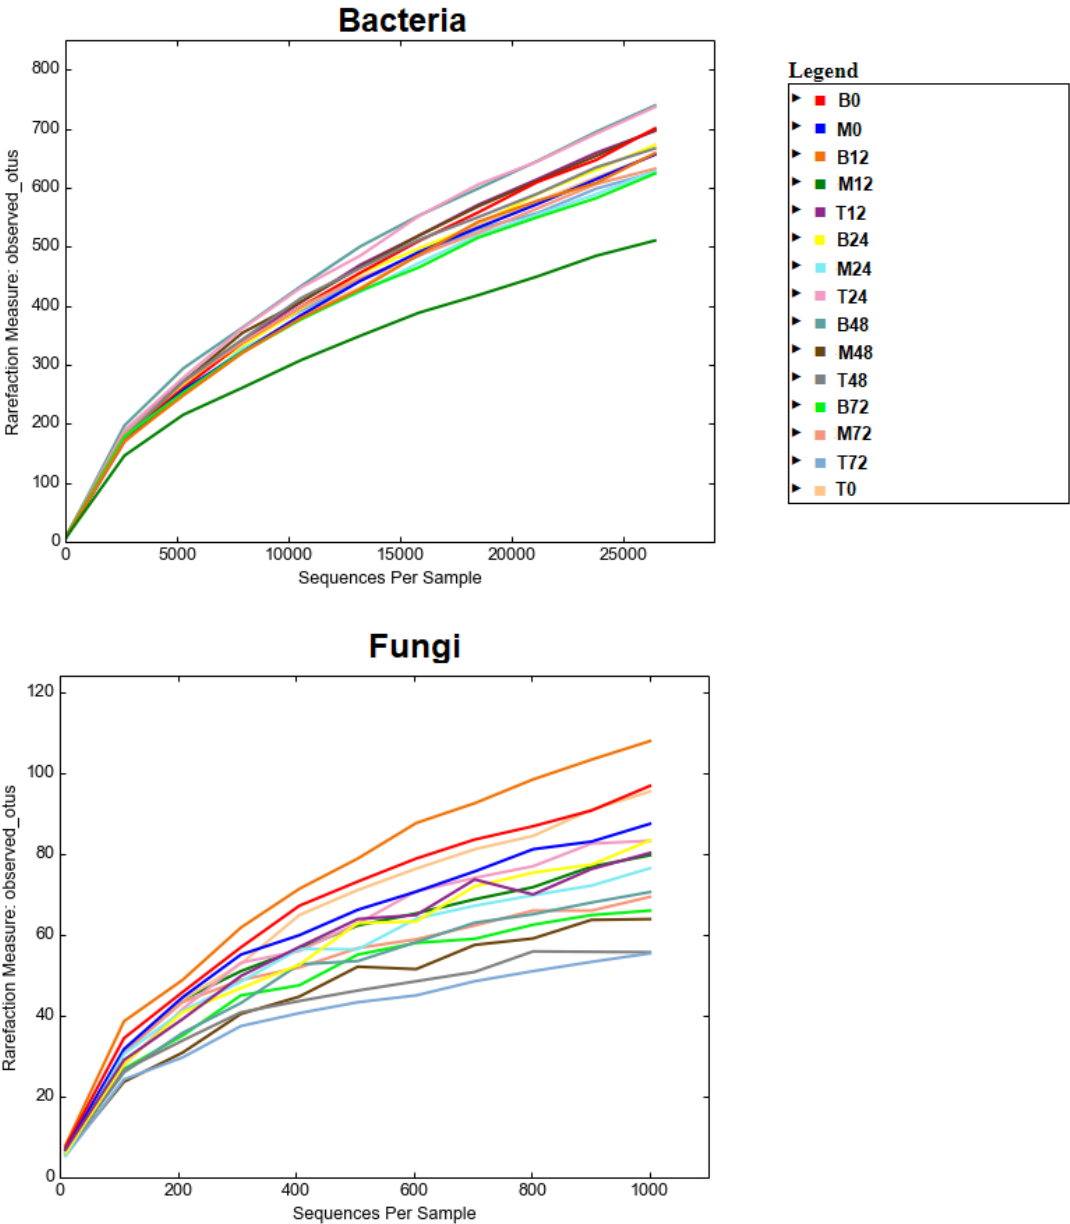

**Figure S1:** Alpha rarefaction curves of the OTUs (operational taxonomic units) observed from the fermentation liquid fraction samples. (A) Bacterial analysis, (B) Fungal analysis.

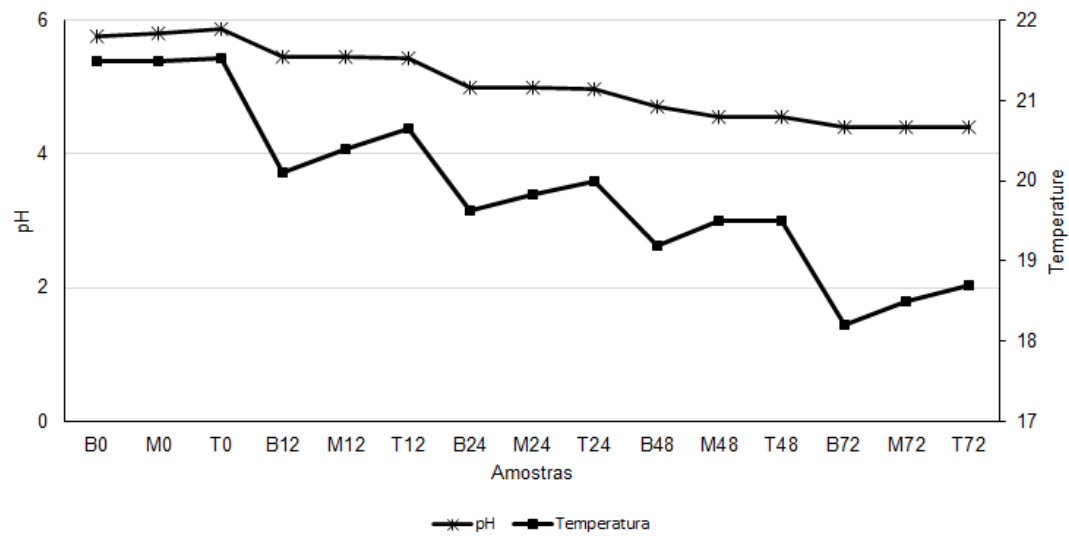

**Figure S2:** Temperature and pH analysis of the bottom (B), middle (M), and, top (T) layers during spontaneous fermentation. The number after each letter represents the fermentation time (e.g., B0= bottom layer at 0 h).

**Table S1:** Relative abundance (%) of bacteria and fungi identified during fermentation of Brazilian coffee beans;

| Microorganisms     | Bacteria    |             |             |             |             |             |             |             |             |             |             |             |             |             |             |
|--------------------|-------------|-------------|-------------|-------------|-------------|-------------|-------------|-------------|-------------|-------------|-------------|-------------|-------------|-------------|-------------|
|                    | B0          | M0          | T0          | B12         | M12         | T12         | B24         | M24         | T24         | B48         | M48         | T48         | B72         | M72         | T72         |
| Other              | 0,957625673 | 0,924161035 | 0,992397687 | 1,011105586 | 1,008736828 | 1,246301299 | 0,736855571 | 0,648057157 | 0,875672928 | 0,549213513 | 0,7913124   | 0,724453943 | 0,478236986 | 0,482854879 | 0,639705085 |
| Enterobacteriaceae | 51,28779941 | 45,36475481 | 61,54231347 | 66,86971656 | 64,92763772 | 60,7246237  | 55,39209415 | 55,4832541  | 56,51671634 | 37,77626601 | 42,33942251 | 42,34071069 | 32,59766698 | 32,48330756 | 38,71842134 |
| Erwinia            | 36,01695948 | 40,50135736 | 27,65967133 | 21,45905851 | 21,77537682 | 27,92358163 | 28,07470897 | 30,06560251 | 28,82558166 | 42,96807593 | 28,3862278  | 42,21755352 | 36,95996381 | 33,85265382 | 30,00975821 |
| Enterobacter       | 2,395282536 | 2,645410963 | 1,973414667 | 1,786010277 | 1,824062959 | 2,343046443 | 1,322758091 | 1,304082229 | 1,839144197 | 1,431937347 | 1,393214917 | 2,894193502 | 1,040488577 | 1,063789656 | 1,134121219 |
| Klebsiella         | 0,00731012  | 0           | 0,009104566 | 0,004143875 | 0,020008003 | 0,003216261 | 0,005117053 | 0,007967916 | 0,046209653 | 0,006637021 | 0,004209109 | 0,007244539 | 0           | 0,003772304 | 0,008673967 |
| Providencia        | 0           | 0           | 0           | 0           | 0           | 0           | 0           | 0           | 0,004620965 | 0           | 0           | 0,007244539 | 0           | 0           | 0           |
| Salmonella         | 0           | 0           | 0,002276141 | 0,002071938 | 0           | 0           | 0           | 0           | 0           | 0           | 0           | 0,00362227  | 0           | 0,003772304 | 0           |
| Serratia           | 0,645727235 | 1,08011321  | 0,915008877 | 0,354301343 | 0,313458717 | 0,678631159 | 0,058846105 | 0,079679159 | 0,145560408 | 0,04977766  | 0,143109689 | 0,12315717  | 0,048469965 | 0,007544607 | 0,11926705  |
| Lactobacillaceae   | 0,173006165 | 0,213712239 | 0,252651705 | 0,120172385 | 0,123382686 | 0,06914962  | 2,5303825   | 1,508592069 | 0,732423003 | 2,404260968 | 3,830288745 | 1,467019234 | 7,286651372 | 13,4935305  | 12,30835954 |
| Lactobacillus      | 0,399619874 | 0,537168602 | 0,546273956 | 0,306646776 | 0,526877418 | 0,209056992 | 3,960598695 | 3,561658389 | 1,707446686 | 8,614853654 | 11,53295732 | 4,625638425 | 12,31137105 | 6,70715606  | 6,488127507 |
| Pediococcus        | 0           | 0           | 0           | 0           | 0           | 0,001608131 | 0,002558526 | 0           | 0           | 0,003318511 | 0           | 0           | 0           | 0           | 0           |
| Weissella          | 0,095031555 | 0,080864091 | 0,020485273 | 0,225841207 | 0,181739362 | 0,032162614 | 0,376103364 | 0,20450984  | 0,136318477 | 0,214043937 | 0,387237983 | 0,094179013 | 0,475005655 | 0,671470067 | 0,236365608 |
| Leuconostocaceae   | 0,494651429 | 0,508288569 | 0,186643602 | 1,085695342 | 1,205482193 | 0,34092371  | 1,565818089 | 2,71971528  | 2,395970518 | 0,721776067 | 1,633134102 | 0,583185424 | 0,594564901 | 1,433475423 | 1,097256858 |
| Leuconostoc        | 3,949901313 | 2,818691157 | 0,849000774 | 3,356539035 | 5,540549553 | 2,373600926 | 2,834847128 | 1,543119705 | 2,451422102 | 2,05913586  | 4,310127115 | 1,021480059 | 2,814489288 | 3,579916255 | 1,867071452 |
| Enterococcaceae    | 0,002436707 | 0           | 0           | 0           | 0           | 0           | 0,017909684 | 0,005311944 | 0,004620965 | 0,001659255 | 0           | 0           | 0           | 0,003772304 | 0,002168492 |
| Enterococcus       | 0,065791077 | 0,075088084 | 0,07738881  | 0,031079065 | 0,050020008 | 0,020905699 | 0,094665473 | 0,058431383 | 0,057762066 | 0,122784894 | 0,105227713 | 0,076067664 | 0,313439106 | 0,24142744  | 0,219017673 |
| Lactococcus        | 0,650600648 | 0,693120776 | 0,3072791   | 2,109232554 | 1,433906896 | 1,473047729 | 2,169630293 | 1,532495817 | 2,370555209 | 1,309152452 | 3,131576732 | 1,658999529 | 1,783694704 | 2,870723151 | 3,883768839 |
| Acetobacteraceae   | 0,384999634 | 0,635360712 | 0,901352028 | 0,070445881 | 0,156729358 | 0,358613148 | 0,061404631 | 0,084991102 | 0,140939442 | 0,53262096  | 0,416701743 | 0,326004274 | 1,689986105 | 0,720510015 | 0,379486067 |
| Acetobacter        | 0,031677185 | 0,028880032 | 0,034142122 | 0           | 0,005002001 | 0,020905699 | 0,005117053 | 0,007967916 | 0,004620965 | 0,004977766 | 0,042091085 | 0,021733618 | 0,029081979 | 0,022633822 | 0,006505475 |
| Pseudomonadaceae   | 0,004873413 | 0,011552013 | 0,006828424 | 0,006215813 | 0,003334667 | 0,012865046 | 0,010234105 | 0,007967916 | 0,011552413 | 0,014933298 | 0,004209109 | 0,014489079 | 0,03231331  | 0,018861519 | 0,008673967 |

|                     |             |             |             |             |             |             |             |             |             |             |             |             |             |             |             |
|---------------------|-------------|-------------|-------------|-------------|-------------|-------------|-------------|-------------|-------------|-------------|-------------|-------------|-------------|-------------|-------------|
| Pseudomonas         | 0,155949219 | 0,462080518 | 0,375563345 | 0,159539201 | 0,10670935  | 0,246043998 | 0,117692209 | 0,148734429 | 0,145560408 | 0,232295746 | 0,218873643 | 0,144890789 | 0,252043817 | 0,505488702 | 0,338284723 |
| Chryseobacterium    | 0,404493287 | 0,629584705 | 1,101652479 | 0,033151003 | 0,10170735  | 0,2042326   | 0,028143789 | 0,018591804 | 0,080866893 | 0,038162873 | 0,109436821 | 0,159379867 | 0,109865253 | 0,109396809 | 0,097582132 |
| Aurantimonadaceae   | 0,024367065 | 0,005776006 | 0,011380707 | 0,024863252 | 0,003334667 | 0,025730091 | 0,012792631 | 0,002655972 | 0,016173379 | 0,011614787 | 0,008418217 | 0,014489079 | 0,009693993 | 0,015089215 | 0,052043804 |
| Comamonadaceae      | 0,004873413 | 0,057760065 | 0,066008103 | 0,010359688 | 0,015006002 | 0,038595137 | 0,007675579 | 0,007967916 | 0,018483861 | 0,011614787 | 0,021045543 | 0,021733618 | 0,006462662 | 0,022633822 | 0,073728722 |
| Oxalobacteraceae    | 0,021930359 | 0,017328019 | 0,059179679 | 0,022791314 | 0,021675337 | 0,041811398 | 0,010234105 | 0,015935832 | 0,025415309 | 0,013274043 | 0,016836434 | 0,00362227  | 0,029081979 | 0,06035686  | 0,030358885 |
| Sphingomonadaceae   | 0,060917664 | 0,167504188 | 0,068284245 | 0,002071938 | 0,01834067  | 0,072365882 | 0,02046821  | 0,010623888 | 0,016173379 | 0,008296277 | 0,037881977 | 0,025355888 | 0,019387986 | 0,015089215 | 0,04770682  |
| Acinetobacter       | 0,036550598 | 0,127072142 | 0,036418264 | 0,047654567 | 0,040016006 | 0,059500836 | 0,023026737 | 0,039839579 | 0,018483861 | 0,011614787 | 0,021045543 | 0,083312203 | 0,016156655 | 0,026406126 | 0,021684918 |
| Agrobacterium       | 0,026803772 | 0,011552013 | 0,043246688 | 0,008287751 | 0,006669334 | 0,017689438 | 0,002558526 | 0,007967916 | 0,006931448 | 0,008296277 | 0,02946376  | 0,014489079 | 0,006462662 | 0,007544607 | 0,019516426 |
| Bacteroides         | 0,065791077 | 0,063536071 | 0,081941093 | 0,020719377 | 0,01834067  | 0,028946353 | 0,010234105 | 0,037183607 | 0,10397172  | 0,031525851 | 0,037881977 | 0,036222697 | 0,016156655 | 0,045267645 | 0,117098558 |
| [Barnesiellaceae]   | 0,00731012  | 0           | 0           | 0           | 0           | 0           | 0           | 0           | 0           | 0           | 0           | 0           | 0           | 0           | 0           |
| 0319-6A21           | 0           | 0           | 0           | 0           | 0           | 0,001608131 | 0,002558526 | 0           | 0           | 0           | 0           | 0           | 0           | 0           | 0           |
| Aeromonadaceae      | 0,009746826 | 0           | 0           | 0           | 0           | 0           | 0           | 0           | 0           | 0           | 0           | 0           | 0           | 0           | 0           |
| Alcaligenaceae      | 0,009746826 | 0,005776006 | 0           | 0           | 0,003334667 | 0,009648784 | 0,005117053 | 0,002655972 | 0,002310483 | 0,003318511 | 0           | 0           | 0,006462662 | 0,003772304 | 0           |
| Alicyclobacillaceae | 0           | 0           | 0           | 0,002071938 | 0           | 0           | 0           | 0,002655972 | 0           | 0           | 0           | 0           | 0           | 0           | 0           |
| Bacillaceae         | 0           | 0           | 0           | 0           | 0           | 0           | 0           | 0           | 0,004620965 | 0           | 0           | 0           | 0           | 0           | 0           |
| Bacteriovoracaceae  | 0           | 0           | 0,002276141 | 0           | 0           | 0,001608131 | 0           | 0,01327986  | 0           | 0           | 0           | 0           | 0           | 0,007544607 | 0,006505475 |
| Beijerinckiaceae    | 0,004873413 | 0           | 0           | 0           | 0           | 0           | 0           | 0           | 0           | 0           | 0           | 0           | 0           | 0           | 0           |
| Bifidobacteriaceae  | 0           | 0           | 0           | 0           | 0           | 0           | 0           | 0           | 0           | 0           | 0           | 0           | 0,006462662 | 0           | 0           |
| Bradyrhizobiaceae   | 0           | 0           | 0,002276141 | 0           | 0           | 0           | 0           | 0           | 0           | 0           | 0           | 0           | 0,006462662 | 0           | 0,002168492 |
| Brucellaceae        | 0           | 0           | 0           | 0           | 0,001667334 | 0           | 0           | 0           | 0           | 0           | 0           | 0,007244539 | 0           | 0           | 0           |
| Caulobacteraceae    | 0,019493652 | 0,011552013 | 0           | 0,004143875 | 0,005002001 | 0,009648784 | 0           | 0,002655972 | 0,002310483 | 0,001659255 | 0,008418217 | 0,018111349 | 0,029081979 | 0           | 0,013010951 |
| Cellulomonadaceae   | 0           | 0           | 0           | 0           | 0           | 0,001608131 | 0,002558526 | 0           | 0           | 0           | 0           | 0,00362227  | 0           | 0,003772304 | 0           |
| Chitinophagaceae    | 0,014620239 | 0,034656039 | 0,047798971 | 0,006215813 | 0,013338669 | 0,006432523 | 0,012792631 | 0,002655972 | 0,002310483 | 0           | 0           | 0           | 0,003231331 | 0,011316911 | 0           |

|                     |             |             |             |             |             |             |             |             |             |             |             |             |             |             |             |
|---------------------|-------------|-------------|-------------|-------------|-------------|-------------|-------------|-------------|-------------|-------------|-------------|-------------|-------------|-------------|-------------|
| Christensenellaceae | 0,002436707 | 0           | 0           | 0,002071938 | 0           | 0           | 0           | 0,002655972 | 0           | 0           | 0           | 0           | 0           | 0           | 0,002168492 |
| Clostridiaceae      | 0,021930359 | 0,023104026 | 0,004552283 | 0,004143875 | 0,005002001 | 0           | 0,010234105 | 0,007967916 | 0,004620965 | 0,003318511 | 0,004209109 | 0           | 0           | 0,011316911 | 0,002168492 |
| Coxiellaceae        | 0           | 0           | 0           | 0           | 0           | 0           | 0           | 0           | 0,004620965 | 0           | 0           | 0           | 0           | 0           | 0           |
| Cytophagaceae       | 0           | 0           | 0           | 0           | 0           | 0,003216261 | 0           | 0           | 0           | 0           | 0,004209109 | 0           | 0           | 0           | 0           |
| D2                  | 0           | 0           | 0           | 0,004143875 | 0           | 0           | 0           | 0           | 0           | 0           | 0           | 0           | 0           | 0           | 0           |
| Dermabacteraceae    | 0           | 0           | 0           | 0           | 0           | 0           | 0           | 0           | 0           | 0,003318511 | 0           | 0           | 0           | 0,026406126 | 0           |
| Ellin6075           | 0,017056946 | 0           | 0,013656849 | 0,002071938 | 0,006669334 | 0,009648784 | 0,017909684 | 0,010623888 | 0,016173379 | 0,003318511 | 0,008418217 | 0,007244539 | 0           | 0,003772304 | 0,032527377 |
| Erysipelotrichaceae | 0           | 0           | 0,002276141 | 0           | 0           | 0           | 0           | 0,002655972 | 0           | 0           | 0           | 0           | 0           | 0           | 0           |
| Erythrobacteraceae  | 0,002436707 | 0,005776006 | 0,002276141 | 0           | 0,001667334 | 0,004824392 | 0           | 0           | 0,006931448 | 0,001659255 | 0           | 0           | 0           | 0           | 0,006505475 |
| FFCH4570            | 0           | 0           | 0           | 0           | 0           | 0           | 0           | 0           | 0           | 0           | 0,008418217 | 0           | 0           | 0           | 0           |
| Flavobacteriaceae   | 0           | 0           | 0,018209132 | 0           | 0           | 0,003216261 | 0           | 0           | 0           | 0           | 0           | 0           | 0           | 0           | 0           |
| Frankiaceae         | 0           | 0           | 0           | 0           | 0,001667334 | 0           | 0           | 0           | 0           | 0           | 0           | 0           | 0           | 0           | 0,002168492 |
| Gaiellaceae         | 0           | 0           | 0           | 0           | 0           | 0           | 0           | 0,002655972 | 0           | 0           | 0           | 0           | 0,003231331 | 0,007544607 | 0           |
| Gemellaceae         | 0           | 0           | 0           | 0           | 0           | 0           | 0           | 0           | 0           | 0,004977766 | 0           | 0           | 0           | 0           | 0           |
| Gemmataceae         | 0           | 0           | 0           | 0           | 0           | 0           | 0,005117053 | 0           | 0           | 0           | 0           | 0           | 0           | 0           | 0           |
| Geodermatophilaceae | 0           | 0           | 0           | 0           | 0           | 0,004824392 | 0           | 0           | 0,002310483 | 0           | 0           | 0           | 0           | 0           | 0           |
| Helicobacteraceae   | 0           | 0           | 0           | 0           | 0           | 0           | 0,002558526 | 0           | 0,002310483 | 0,003318511 | 0           | 0           | 0           | 0           | 0           |
| Hyphomonadaceae     | 0           | 0           | 0           | 0           | 0           | 0,001608131 | 0           | 0           | 0           | 0           | 0,004209109 | 0           | 0           | 0           | 0           |
| Isosphaeraceae      | 0,004873413 | 0           | 0,006828424 | 0           | 0           | 0,003216261 | 0           | 0           | 0           | 0           | 0           | 0,00362227  | 0           | 0           | 0           |
| Koribacteraceae     | 0           | 0           | 0           | 0           | 0,001667334 | 0,001608131 | 0,002558526 | 0           | 0           | 0           | 0           | 0           | 0           | 0           | 0,004336984 |
| Lachnospiraceae     | 0,14132898  | 0,023104026 | 0,029589839 | 0,014503564 | 0,008336668 | 0,012865046 | 0,005117053 | 0,007967916 | 0,032346757 | 0,013274043 | 0,021045543 | 0           | 0,012925324 | 0,026406126 | 0,054212295 |
| mb2424              | 0           | 0           | 0           | 0           | 0,001667334 | 0           | 0,007675579 | 0           | 0           | 0           | 0,004209109 | 0           | 0           | 0           | 0           |
| Methylobacteriaceae | 0,00731012  | 0,011552013 | 0,01593299  | 0,002071938 | 0,001667334 | 0,064325228 | 0           | 0,005311944 | 0,013862896 | 0,001659255 | 0,046300194 | 0,00362227  | 0,006462662 | 0           | 0,043369836 |

|                     |             |             |             |             |             |             |             |             |             |             |             |             |             |             |             |
|---------------------|-------------|-------------|-------------|-------------|-------------|-------------|-------------|-------------|-------------|-------------|-------------|-------------|-------------|-------------|-------------|
| Methylocystaceae    | 0           | 0           | 0           | 0           | 0           | 0,030554483 | 0,002558526 | 0           | 0,002310483 | 0           | 0           | 0           | 0           | 0           | 0,015179443 |
| Methylophilaceae    | 0           | 0           | 0           | 0           | 0,001667334 | 0           | 0           | 0           | 0,006931448 | 0           | 0           | 0           | 0           | 0           | 0           |
| Microbacteriaceae   | 0,002436707 | 0           | 0,002276141 | 0,004143875 | 0,001667334 | 0,001608131 | 0,002558526 | 0,002655972 | 0           | 0,001659255 | 0,004209109 | 0,00362227  | 0,003231331 | 0           | 0,019516426 |
| Micrococcaceae      | 0           | 0           | 0           | 0           | 0           | 0,003216261 | 0           | 0,002655972 | 0           | 0           | 0,004209109 | 0           | 0           | 0           | 0           |
| Micromonosporaceae  | 0           | 0           | 0           | 0           | 0           | 0,006432523 | 0           | 0           | 0,002310483 | 0           | 0,004209109 | 0           | 0           | 0           | 0           |
| Moraxellaceae       | 0,002436707 | 0,005776006 | 0           | 0           | 0           | 0,001608131 | 0           | 0           | 0           | 0           | 0           | 0           | 0           | 0           | 0           |
| Nocardiodiaceae     | 0           | 0           | 0,002276141 | 0,002071938 | 0           | 0,011256915 | 0,002558526 | 0           | 0,002310483 | 0,001659255 | 0           | 0,00362227  | 0,006462662 | 0,015089215 | 0,04770682  |
| Paenibacillaceae    | 0           | 0           | 0,006828424 | 0           | 0           | 0,006432523 | 0,002558526 | 0           | 0,002310483 | 0           | 0           | 0           | 0,009693993 | 0,041495341 | 0,006505475 |
| Phyllobacteriaceae  | 0           | 0,011552013 | 0           | 0           | 0           | 0,001608131 | 0           | 0           | 0           | 0           | 0           | 0           | 0           | 0           | 0           |
| Pirellulaceae       | 0           | 0           | 0,020485273 | 0           | 0           | 0           | 0           | 0           | 0           | 0           | 0           | 0           | 0           | 0           | 0           |
| Piscirickettsiaceae | 0           | 0           | 0           | 0           | 0,001667334 | 0           | 0,007675579 | 0           | 0           | 0           | 0,004209109 | 0           | 0           | 0           | 0           |
| Porphyromonadaceae  | 0,017056946 | 0,005776006 | 0,018209132 | 0,014503564 | 0,005002001 | 0,016081307 | 0           | 0,061087355 | 0,013862896 | 0,001659255 | 0,008418217 | 0,010866809 | 0,012925324 | 0,033950734 | 0,034695869 |
| Procabacteriaceae   | 0           | 0           | 0           | 0           | 0           | 0           | 0           | 0           | 0           | 0           | 0           | 0           | 0,012925324 | 0           | 0           |
| PRR-10              | 0           | 0           | 0           | 0           | 0           | 0,003216261 | 0,005117053 | 0           | 0           | 0           | 0           | 0           | 0           | 0           | 0           |
| Rhizobiaceae        | 0,002436707 | 0           | 0           | 0           | 0           | 0           | 0           | 0           | 0           | 0,001659255 | 0           | 0           | 0,003231331 | 0           | 0,002168492 |
| Rhodobacteraceae    | 0,002436707 | 0           | 0,004552283 | 0           | 0           | 0           | 0           | 0           | 0           | 0           | 0           | 0           | 0           | 0           | 0           |
| Rhodocyclaceae      | 0           | 0           | 0,002276141 | 0,002071938 | 0           | 0           | 0,005117053 | 0,002655972 | 0           | 0           | 0,004209109 | 0           | 0           | 0,011316911 | 0           |
| Rhodospirillaceae   | 0           | 0           | 0           | 0           | 0           | 0,001608131 | 0,007675579 | 0,002655972 | 0           | 0           | 0,008418217 | 0           | 0           | 0           | 0,002168492 |
| Ruminococcaceae     | 0,026803772 | 0,005776006 | 0,009104566 | 0           | 0           | 0           | 0           | 0           | 0,009241931 | 0           | 0           | 0,007244539 | 0           | 0           | 0           |
| S24-7               | 0,053607544 | 0,011552013 | 0,011380707 | 0           | 0           | 0           | 0           | 0,002655972 | 0,004620965 | 0           | 0           | 0           | 0           | 0           | 0,021684918 |
| Sinobacteraceae     | 0           | 0           | 0,004552283 | 0           | 0           | 0,008040654 | 0           | 0           | 0,002310483 | 0           | 0           | 0           | 0           | 0,007544607 | 0           |
| Solibacteraceae     | 0           | 0           | 0,002276141 | 0,002071938 | 0           | 0           | 0           | 0           | 0           | 0           | 0           | 0           | 0           | 0           | 0           |
| Sphingobacteriaceae | 0,00731012  | 0,011552013 | 0,047798971 | 0,018647439 | 0,003334667 | 0,014473176 | 0,005117053 | 0,007967916 | 0,006931448 | 0,013274043 | 0,016836434 | 0,014489079 | 0,003231331 | 0           | 0,067223246 |

|                      |             |             |             |             |             |             |             |             |             |             |             |            |             |             |             |
|----------------------|-------------|-------------|-------------|-------------|-------------|-------------|-------------|-------------|-------------|-------------|-------------|------------|-------------|-------------|-------------|
| Syntrophobacteraceae | 0           | 0,005776006 | 0           | 0           | 0           | 0           | 0,002558526 | 0           | 0           | 0           | 0,004209109 | 0          | 0           | 0,003772304 | 0           |
| Veillonellaceae      | 0,012183533 | 0,005776006 | 0,009104566 | 0,014503564 | 0,010004002 | 0,009648784 | 0,005117053 | 0           | 0,011552413 | 0,008296277 | 0,025254651 | 0,00362227 | 0,016156655 | 0           | 0,002168492 |
| Xanthomonadaceae     | 0,00731012  | 0           | 0           | 0,002071938 | 0,001667334 | 0,017689438 | 0,002558526 | 0,007967916 | 0,002310483 | 0,011614787 | 0,012627326 | 0,00362227 | 0,071089282 | 0,026406126 | 0           |
| [Prevotella]         | 0           | 0           | 0           | 0           | 0           | 0           | 0           | 0           | 0           | 0,003318511 | 0           | 0          | 0           | 0           | 0           |
| [Ruminococcus]       | 0,002436707 | 0           | 0           | 0           | 0           | 0           | 0           | 0           | 0           | 0           | 0           | 0          | 0           | 0           | 0,002168492 |
| A17                  | 0           | 0           | 0           | 0           | 0           | 0           | 0           | 0,002655972 | 0,006931448 | 0           | 0           | 0          | 0           | 0           | 0           |
| Achromobacter        | 0           | 0           | 0           | 0           | 0           | 0,006432523 | 0           | 0,002655972 | 0           | 0,003318511 | 0           | 0          | 0           | 0           | 0           |
| Acidaminobacter      | 0,004873413 | 0           | 0           | 0,002071938 | 0           | 0           | 0           | 0           | 0,002310483 | 0           | 0           | 0          | 0           | 0           | 0           |
| Acidovorax           | 0,002436707 | 0           | 0,006828424 | 0           | 0           | 0,003216261 | 0           | 0           | 0,006931448 | 0           | 0,016836434 | 0,00362227 | 0           | 0           | 0           |
| Actinomyces          | 0           | 0           | 0           | 0           | 0           | 0           | 0           | 0           | 0           | 0,003318511 | 0           | 0          | 0           | 0           | 0           |
| Actinomycetospora    | 0,00731012  | 0,005776006 | 0,013656849 | 0,006215813 | 0           | 0,003216261 | 0           | 0,002655972 | 0           | 0           | 0,008418217 | 0          | 0,003231331 | 0           | 0           |
| Aerococcus           | 0           | 0           | 0           | 0           | 0           | 0           | 0           | 0           | 0           | 0,001659255 | 0           | 0          | 0,003231331 | 0,007544607 | 0,006505475 |
| Aeromicrobium        | 0           | 0           | 0           | 0           | 0           | 0           | 0,007675579 | 0           | 0           | 0           | 0           | 0          | 0           | 0,007544607 | 0           |
| Aggregatibacter      | 0           | 0           | 0           | 0           | 0           | 0           | 0           | 0           | 0           | 0,003318511 | 0           | 0          | 0           | 0           | 0           |
| Akkermansia          | 0,004873413 | 0           | 0           | 0           | 0           | 0           | 0           | 0           | 0           | 0           | 0           | 0          | 0           | 0           | 0           |
| Allochromatium       | 0           | 0           | 0           | 0           | 0           | 0,001608131 | 0           | 0           | 0           | 0           | 0           | 0          | 0           | 0           | 0,004336984 |
| Aminobacter          | 0           | 0,011552013 | 0,002276141 | 0           | 0           | 0,001608131 | 0           | 0           | 0           | 0           | 0           | 0          | 0           | 0           | 0           |
| Ammoniphilus         | 0           | 0           | 0           | 0           | 0           | 0,001608131 | 0           | 0           | 0           | 0           | 0           | 0          | 0           | 0           | 0,002168492 |
| Amycolatopsis        | 0           | 0           | 0           | 0           | 0           | 0           | 0           | 0           | 0           | 0           | 0,008418217 | 0          | 0           | 0           | 0           |
| Anaerofilum          | 0           | 0           | 0,009104566 | 0           | 0           | 0           | 0           | 0           | 0           | 0           | 0           | 0          | 0           | 0           | 0           |
| Anaerolinea          | 0           | 0           | 0           | 0           | 0           | 0,001608131 | 0           | 0           | 0           | 0           | 0,004209109 | 0          | 0           | 0           | 0           |
| Anaeromusa           | 0           | 0           | 0           | 0           | 0           | 0,003216261 | 0           | 0,002655972 | 0           | 0,003318511 | 0           | 0          | 0           | 0           | 0           |
| Anoxybacillus        | 0           | 0           | 0           | 0           | 0           | 0           | 0           | 0           | 0,004620965 | 0           | 0           | 0          | 0           | 0           | 0           |

|                       |             |             |             |             |             |             |             |             |             |             |             |             |             |             |             |
|-----------------------|-------------|-------------|-------------|-------------|-------------|-------------|-------------|-------------|-------------|-------------|-------------|-------------|-------------|-------------|-------------|
| Aquicella             | 0           | 0           | 0,006828424 | 0           | 0           | 0           | 0           | 0           | 0           | 0           | 0           | 0           | 0           | 0           | 0           |
| Arcobacter            | 0,00731012  | 0,028880032 | 0,027313698 | 0           | 0,010004002 | 0,020905699 | 0,012792631 | 0,007967916 | 0,013862896 | 0,048118404 | 0,004209109 | 0,018111349 | 0,012925324 | 0,056584556 | 0           |
| Arsenicicoccus        | 0           | 0           | 0           | 0           | 0           | 0,006432523 | 0           | 0           | 0           | 0           | 0           | 0           | 0           | 0           | 0           |
| Arthrobacter          | 0           | 0           | 0           | 0           | 0           | 0,003216261 | 0           | 0           | 0           | 0,001659255 | 0           | 0,00362227  | 0           | 0           | 0           |
| Aurantimonas          | 0,00731012  | 0           | 0,009104566 | 0           | 0           | 0,008040654 | 0           | 0           | 0           | 0           | 0           | 0,00362227  | 0           | 0,026406126 | 0,032527377 |
| Azospira              | 0,002436707 | 0           | 0           | 0           | 0,001667334 | 0           | 0           | 0           | 0           | 0,001659255 | 0           | 0           | 0           | 0           | 0           |
| Bacillus              | 0           | 0           | 0           | 0           | 0,003334667 | 0           | 0           | 0,002655972 | 0,030036275 | 0,028207341 | 0,004209109 | 0           | 0,009693993 | 0           | 0           |
| Bdellovibrio          | 0,004873413 | 0           | 0,002276141 | 0           | 0,001667334 | 0,009648784 | 0           | 0           | 0           | 0           | 0,004209109 | 0,007244539 | 0           | 0           | 0           |
| Bifidobacterium       | 0,009746826 | 0,005776006 | 0           | 0           | 0           | 0           | 0           | 0           | 0,002310483 | 0           | 0           | 0           | 0           | 0           | 0           |
| Blastomonas           | 0           | 0           | 0,002276141 | 0           | 0           | 0,001608131 | 0,005117053 | 0           | 0           | 0           | 0           | 0           | 0           | 0           | 0,006505475 |
| Blvii28               | 0           | 0           | 0           | 0           | 0           | 0           | 0,005117053 | 0           | 0           | 0           | 0           | 0           | 0           | 0,018861519 | 0           |
| Brachybacterium       | 0           | 0           | 0,006828424 | 0           | 0           | 0           | 0           | 0           | 0,002310483 | 0,004977766 | 0,004209109 | 0,00362227  | 0,003231331 | 0,026406126 | 0,021684918 |
| Brevibacterium        | 0           | 0           | 0           | 0           | 0           | 0           | 0           | 0           | 0           | 0           | 0           | 0           | 0,006462662 | 0           | 0           |
| Brevundimonas         | 0,029240479 | 0,011552013 | 0,002276141 | 0           | 0           | 0,001608131 | 0           | 0           | 0           | 0           | 0           | 0           | 0           | 0           | 0           |
| Burkholderia          | 0,014620239 | 0,017328019 | 0,004552283 | 0,002071938 | 0,001667334 | 0,008040654 | 0,002558526 | 0           | 0,004620965 | 0,003318511 | 0,025254651 | 0,010866809 | 0           | 0,052812252 | 0,026021902 |
| Candidatus Koribacter | 0           | 0           | 0,004552283 | 0           | 0           | 0,001608131 | 0           | 0           | 0           | 0           | 0           | 0           | 0           | 0           | 0,008673967 |
| Candidatus Portiera   | 0,002436707 | 0,005776006 | 0,011380707 | 0           | 0,003334667 | 0,001608131 | 0,002558526 | 0           | 0           | 0,009955532 | 0           | 0,00362227  | 0,019387986 | 0,037723037 | 0,006505475 |
| Candidatus Solibacter | 0           | 0           | 0           | 0           | 0           | 0           | 0,002558526 | 0           | 0,002310483 | 0           | 0           | 0           | 0           | 0           | 0,002168492 |
| Carnobacterium        | 0           | 0           | 0           | 0           | 0           | 0           | 0           | 0           | 0           | 0,001659255 | 0           | 0,00362227  | 0           | 0,052812252 | 0           |
| Cellvibrio            | 0           | 0           | 0           | 0           | 0           | 0,003216261 | 0           | 0           | 0           | 0           | 0           | 0           | 0           | 0           | 0           |
| Chthoniobacter        | 0           | 0           | 0,004552283 | 0           | 0           | 0           | 0           | 0           | 0           | 0           | 0           | 0           | 0           | 0           | 0           |
| Citrobacter           | 0,051170837 | 0,034656039 | 0,029589839 | 0,043510691 | 0,06502601  | 0,049852052 | 0,017909684 | 0,021247776 | 0,057762066 | 0,028207341 | 0,042091085 | 0,028978158 | 0,06462662  | 0,018861519 | 0,026021902 |
| Cloacibacterium       | 0,004873413 | 0           | 0,018209132 | 0,012431626 | 0,006669334 | 0,001608131 | 0,005117053 | 0,055775411 | 0,060072549 | 0           | 0,008418217 | 0,010866809 | 0           | 0           | 0           |





[illegible]

|                  |             |             |             |             |             |             |             |             |             |             |             |             |             |             |             |
|------------------|-------------|-------------|-------------|-------------|-------------|-------------|-------------|-------------|-------------|-------------|-------------|-------------|-------------|-------------|-------------|
| Luteibacter      | 0           | 0,005776006 | 0           | 0           | 0           | 0,011256915 | 0           | 0,002655972 | 0,009241931 | 0,001659255 | 0,012627326 | 0,00362227  | 0           | 0           | 0           |
| Luteimonas       | 0           | 0,005776006 | 0,002276141 | 0           | 0           | 0           | 0           | 0           | 0           | 0,001659255 | 0           | 0,007244539 | 0           | 0           | 0           |
| Lysobacter       | 0           | 0,005776006 | 0           | 0           | 0           | 0,006432523 | 0,012792631 | 0           | 0,002310483 | 0           | 0           | 0           | 0           | 0           | 0           |
| Magnetospirillum | 0           | 0           | 0           | 0           | 0           | 0           | 0,005117053 | 0           | 0,002310483 | 0,013274043 | 0,004209109 | 0           | 0,003231331 | 0           | 0           |
| Megasphaera      | 0           | 0           | 0,002276141 | 0           | 0,003334667 | 0           | 0           | 0           | 0           | 0           | 0           | 0           | 0           | 0,003772304 | 0,002168492 |
| Methylibium      | 0           | 0           | 0,004552283 | 0           | 0           | 0,001608131 | 0           | 0           | 0           | 0           | 0           | 0           | 0           | 0           | 0           |
| Methylobacterium | 0,073101196 | 0,121296136 | 0,152501479 | 0,076661694 | 0,026677338 | 0,192975685 | 0,030702315 | 0,031871663 | 0,067003997 | 0,044799894 | 0,109436821 | 0,057956315 | 0,061395289 | 0,067901467 | 0,201669739 |
| Microbacterium   | 0,004873413 | 0           | 0           | 0           | 0           | 0,003216261 | 0           | 0           | 0           | 0,001659255 | 0,004209109 | 0           | 0           | 0           | 0           |
| Mitsuaria        | 0           | 0           | 0           | 0           | 0           | 0,004824392 | 0           | 0           | 0           | 0           | 0           | 0           | 0           | 0           | 0           |
| Mycobacterium    | 0           | 0           | 0           | 0           | 0           | 0,006432523 | 0           | 0           | 0           | 0           | 0,004209109 | 0           | 0           | 0,007544607 | 0           |
| Neisseria        | 0           | 0           | 0           | 0           | 0           | 0           | 0           | 0           | 0           | 0,003318511 | 0           | 0           | 0           | 0           | 0           |
| Nitrospira       | 0           | 0           | 0           | 0           | 0           | 0,004824392 | 0,002558526 | 0           | 0           | 0           | 0,004209109 | 0           | 0           | 0           | 0           |
| Nocardioides     | 0           | 0           | 0           | 0           | 0           | 0           | 0           | 0           | 0           | 0           | 0           | 0           | 0           | 0,011316911 | 0           |
| Novispirillum    | 0,002436707 | 0           | 0           | 0           | 0,001667334 | 0           | 0           | 0           | 0           | 0           | 0           | 0           | 0,003231331 | 0           | 0           |
| Novosphingobium  | 0,00731012  | 0,017328019 | 0,013656849 | 0           | 0,010004002 | 0,019297569 | 0,002558526 | 0,005311944 | 0,002310483 | 0,008296277 | 0,025254651 | 0           | 0,003231331 | 0           | 0,013010951 |
| Ochrobactrum     | 0,012183533 | 0,034656039 | 0,006828424 | 0           | 0,001667334 | 0,012865046 | 0           | 0,002655972 | 0           | 0           | 0,025254651 | 0,018111349 | 0,019387986 | 0,033950734 | 0,019516426 |
| Opitutus         | 0           | 0           | 0           | 0           | 0           | 0,001608131 | 0,002558526 | 0           | 0           | 0           | 0           | 0           | 0           | 0           | 0           |
| Oscillospira     | 0,004873413 | 0           | 0           | 0,002071938 | 0           | 0           | 0           | 0           | 0,004620965 | 0           | 0           | 0           | 0,003231331 | 0           | 0,002168492 |
| Paenibacillus    | 0,00731012  | 0           | 0,01593299  | 0           | 0,001667334 | 0           | 0,002558526 | 0,002655972 | 0           | 0           | 0           | 0           | 0           | 0,018861519 | 0,002168492 |
| Paludibacter     | 0           | 0,011552013 | 0           | 0,006215813 | 0,001667334 | 0           | 0,005117053 | 0,007967916 | 0,006931448 | 0,003318511 | 0           | 0,010866809 | 0           | 0           | 0           |
| Pantoea          | 0,021930359 | 0,034656039 | 0,025037556 | 0,022791314 | 0,021675337 | 0,024121961 | 0,030702315 | 0,021247776 | 0,048520136 | 0,033185107 | 0,02946376  | 0,014489079 | 0,029081979 | 0,052812252 | 0,017347935 |
| Paracoccus       | 0,00731012  | 0           | 0           | 0           | 0,001667334 | 0           | 0           | 0,002655972 | 0,006931448 | 0           | 0           | 0           | 0,006462662 | 0           | 0,013010951 |
| Pedobacter       | 0,00731012  | 0,017328019 | 0,031865981 | 0,002071938 | 0           | 0,004824392 | 0,002558526 | 0,002655972 | 0,006931448 | 0,003318511 | 0,012627326 | 0,054334046 | 0,016156655 | 0,045267645 | 0,02385341  |

|                    |             |             |             |             |             |             |             |             |             |             |             |             |             |             |             |
|--------------------|-------------|-------------|-------------|-------------|-------------|-------------|-------------|-------------|-------------|-------------|-------------|-------------|-------------|-------------|-------------|
| Perlucidibaca      | 0           | 0           | 0           | 0           | 0           | 0,036987006 | 0           | 0           | 0           | 0           | 0,025254651 | 0           | 0           | 0           | 0           |
| Pigmentiphaga      | 0           | 0           | 0           | 0,002071938 | 0           | 0,001608131 | 0           | 0           | 0           | 0           | 0           | 0           | 0           | 0           | 0           |
| Planctomyces       | 0           | 0           | 0           | 0           | 0           | 0           | 0,005117053 | 0           | 0           | 0           | 0           | 0           | 0           | 0           | 0           |
| Plesiocystis       | 0           | 0           | 0           | 0           | 0           | 0           | 0,002558526 | 0           | 0           | 0           | 0           | 0           | 0           | 0,003772304 | 0           |
| Prauseria          | 0           | 0           | 0           | 0           | 0,001667334 | 0           | 0           | 0           | 0           | 0           | 0           | 0           | 0           | 0           | 0,002168492 |
| Prevotella         | 0,124272034 | 0,306128343 | 0,289069969 | 0,15125145  | 0,056689342 | 0,109352888 | 0,030702315 | 0,021247776 | 0,067003997 | 0,09955532  | 0,046300194 | 0,032600427 | 0,180954535 | 0,207476706 | 0,140951968 |
| Propionibacterium  | 0           | 0           | 0           | 0           | 0           | 0           | 0           | 0           | 0,002310483 | 0,001659255 | 0           | 0           | 0           | 0           | 0           |
| Proteus            | 0           | 0           | 0           | 0           | 0           | 0,003216261 | 0,002558526 | 0           | 0           | 0,001659255 | 0           | 0,00362227  | 0,003231331 | 0           | 0,002168492 |
| Pseudoclavibacter  | 0           | 0           | 0,002276141 | 0           | 0           | 0           | 0           | 0           | 0           | 0           | 0           | 0           | 0           | 0           | 0,002168492 |
| Pseudonocardia     | 0           | 0           | 0           | 0           | 0           | 0           | 0           | 0,002655972 | 0           | 0           | 0,008418217 | 0,010866809 | 0           | 0           | 0           |
| Rhodobacter        | 0           | 0           | 0,006828424 | 0           | 0           | 0           | 0           | 0           | 0           | 0           | 0           | 0           | 0           | 0           | 0           |
| Rhodococcus        | 0           | 0           | 0           | 0           | 0           | 0,006432523 | 0           | 0           | 0           | 0           | 0           | 0           | 0           | 0           | 0           |
| Ruminococcus       | 0,034113892 | 0           | 0           | 0           | 0,001667334 | 0           | 0           | 0           | 0,013862896 | 0           | 0           | 0           | 0           | 0           | 0,002168492 |
| Sedimentibacter    | 0           | 0           | 0           | 0           | 0           | 0           | 0           | 0,005311944 | 0           | 0           | 0           | 0           | 0           | 0           | 0           |
| Segetibacter       | 0,009746826 | 0           | 0           | 0,010359688 | 0           | 0           | 0           | 0           | 0           | 0           | 0           | 0           | 0           | 0           | 0           |
| Selenomonas        | 0           | 0           | 0           | 0           | 0           | 0           | 0           | 0           | 0           | 0,003318511 | 0           | 0           | 0           | 0           | 0           |
| Simplicispira      | 0,002436707 | 0           | 0,013656849 | 0           | 0           | 0,001608131 | 0           | 0           | 0,002310483 | 0,003318511 | 0           | 0           | 0           | 0           | 0           |
| SMB53              | 0,004873413 | 0           | 0           | 0           | 0           | 0           | 0           | 0           | 0           | 0           | 0           | 0           | 0           | 0           | 0           |
| Sphingobacterium   | 0,146202393 | 0,09819211  | 0,109254791 | 0,037294878 | 0,005002001 | 0,02251383  | 0,017909684 | 0,268253167 | 0,016173379 | 0,014933298 | 0,058927519 | 0,217336183 | 0,045238634 | 0,064129164 | 0,028190394 |
| Sphingobium        | 0,012183533 | 0           | 0,009104566 | 0           | 0,008336668 | 0,009648784 | 0,002558526 | 0           | 0           | 0,019911064 | 0           | 0           | 0,006462662 | 0,026406126 | 0,028190394 |
| Sphingomonas       | 0,06335437  | 0,103968116 | 0,157053762 | 0,122244323 | 0,02334267  | 0,119001672 | 0,017909684 | 0,02655972  | 0,067003997 | 0,044799894 | 0,037881977 | 0,119534901 | 0,077551944 | 0,101852201 | 0,286240919 |
| Spirosoma          | 0           | 0,011552013 | 0,070560386 | 0           | 0,001667334 | 0,001608131 | 0           | 0           | 0,013862896 | 0,003318511 | 0,021045543 | 0,00362227  | 0,006462662 | 0,007544607 | 0,032527377 |
| Sporolactobacillus | 0,009746826 | 0,132848149 | 0,011380707 | 0,012431626 | 0,006669334 | 0,054676444 | 0,012792631 | 0,002655972 | 0,009241931 | 0,013274043 | 0,016836434 | 0           | 0           | 0,003772304 | 0,002168492 |

|                  |             |             |             |             |             |             |             |             |             |             |             |             |             |             |             |
|------------------|-------------|-------------|-------------|-------------|-------------|-------------|-------------|-------------|-------------|-------------|-------------|-------------|-------------|-------------|-------------|
| Sporotomaculum   | 0           | 0           | 0           | 0           | 0,004143875 | 0           | 0           | 0           | 0           | 0           | 0           | 0           | 0           | 0           | 0           |
| Staphylococcus   | 0           | 0           | 0           | 0           | 0           | 0           | 0           | 0           | 0           | 0           | 0           | 0           | 0           | 0,007544607 | 0           |
| Stenotrophomonas | 0,00731012  | 0,005776006 | 0,004552283 | 0,010359688 | 0,001667334 | 0,024121961 | 0           | 0           | 0,009241931 | 0,02488883  | 0,008418217 | 0,018111349 | 0,006462662 | 0,015089215 | 0,086739673 |
| Steroidobacter   | 0,002436707 | 0           | 0           | 0           | 0           | 0,003216261 | 0,002558526 | 0           | 0           | 0           | 0           | 0           | 0           | 0           | 0           |
| Streptococcus    | 0,004873413 | 0,005776006 | 0           | 0           | 0           | 0           | 0           | 0           | 0           | 0,044799894 | 0           | 0           | 0           | 0           | 0           |
| Sulfurospirillum | 0           | 0           | 0,006828424 | 0           | 0           | 0           | 0           | 0,010623888 | 0,013862896 | 0,006637021 | 0,004209109 | 0,00362227  | 0,006462662 | 0,011316911 | 0,036864361 |
| Sutterella       | 0,014620239 | 0           | 0           | 0           | 0           | 0           | 0           | 0,002655972 | 0           | 0           | 0           | 0           | 0           | 0           | 0           |
| Swaminathania    | 0           | 0           | 0,002276141 | 0           | 0           | 0,001608131 | 0           | 0           | 0           | 0           | 0           | 0           | 0           | 0           | 0           |
| Symbiobacterium  | 0           | 0           | 0           | 0,008287751 | 0           | 0           | 0           | 0,002655972 | 0           | 0           | 0           | 0           | 0           | 0           | 0           |
| Thermomonas      | 0           | 0           | 0           | 0           | 0           | 0           | 0           | 0           | 0           | 0           | 0,008418217 | 0           | 0           | 0           | 0           |
| Thiobacillus     | 0           | 0           | 0           | 0           | 0           | 0,003216261 | 0,002558526 | 0           | 0           | 0           | 0,008418217 | 0           | 0           | 0,003772304 | 0           |
| Trabulsiella     | 0,019493652 | 0           | 0,020485273 | 0,002071938 | 0,011671335 | 0,017689438 | 0,010234105 | 0,005311944 | 0,011552413 | 0,001659255 | 0,008418217 | 0,00362227  | 0,009693993 | 0           | 0,010842459 |
| Trichococcus     | 0           | 0           | 0           | 0           | 0           | 0           | 0           | 0           | 0           | 0,003318511 | 0           | 0           | 0           | 0           | 0           |
| Turicibacter     | 0,004873413 | 0           | 0           | 0           | 0           | 0           | 0           | 0           | 0           | 0           | 0           | 0           | 0           | 0           | 0           |
| vadinHB04        | 0           | 0           | 0           | 0           | 0           | 0,004824392 | 0           | 0           | 0           | 0           | 0,008418217 | 0           | 0           | 0           | 0           |
| Variovorax       | 0           | 0           | 0,004552283 | 0           | 0           | 0,003216261 | 0           | 0           | 0           | 0           | 0           | 0           | 0           | 0           | 0           |
| Veillonella      | 0,002436707 | 0           | 0           | 0           | 0           | 0           | 0           | 0           | 0           | 0,013274043 | 0           | 0           | 0           | 0           | 0           |
| Wautersiella     | 0           | 0,005776006 | 0           | 0,018647439 | 0,071695345 | 0           | 0           | 0,042495551 | 0,32115709  | 0,004977766 | 0,004209109 | 0           | 0           | 0           | 0,019516426 |
| Xenorhabdus      | 0,002436707 | 0,005776006 | 0           | 0,002071938 | 0           | 0           | 0,002558526 | 0           | 0           | 0           | 0           | 0           | 0           | 0           | 0           |
| Zoogloea         | 0           | 0           | 0           | 0           | 0,001667334 | 0           | 0           | 0           | 0           | 0           | 0           | 0           | 0,006462662 | 0           | 0,015179443 |
| Microorganisms   | Fungi       |             |             |             |             |             |             |             |             |             |             |             |             |             |             |
|                  | B0          | M0          | T0          | B12         | M12         | T12         | B24         | M24         | T24         | B48         | M48         | T48         | B72         | M72         | T72         |
| Nectriaceae      | 31,79723502 | 31,35634419 | 37,21428571 | 24,73246136 | 34,89604566 | 25,43815088 | 51,78303866 | 49,57898958 | 53,28366987 | 26,61115134 | 34,61683654 | 50,84637496 | 46,67303407 | 42,11145997 | 46,68794892 |

|                    |             |             |             |             |             |             |             |             |             |             |             |             |             |             |             |
|--------------------|-------------|-------------|-------------|-------------|-------------|-------------|-------------|-------------|-------------|-------------|-------------|-------------|-------------|-------------|-------------|
| Mycosphaerellaceae | 2,534562212 | 2,430724356 | 1,142857143 | 1,902497027 | 1,182225846 | 1,066802134 | 0,689241834 | 1,623897354 | 1,50950794  | 0,615496017 | 0,20385051  | 0,862344299 | 0,270614454 | 2,276295133 | 2,075019952 |
| Trichosporonaceae  | 1,900921659 | 1,263976665 | 1,5         | 1,783590963 | 2,609050143 | 0,96520193  | 0,71920887  | 0,741780273 | 1,274259949 | 0,579290369 | 0,792751982 | 0,606834877 | 0,668576886 | 4,081632653 | 1,356743815 |
| Tremellales        | 0,806451613 | 3,354399611 | 2,642857143 | 2,615933413 | 1,182225846 | 1,371602743 | 1,798022176 | 1,002405774 | 0,960595962 | 1,013758146 | 1,834654587 | 1,149792399 | 0,620821394 | 1,628728414 | 0,03990423  |
| Alternaria         | 5,011520737 | 5,930967428 | 4,285714286 | 2,615933413 | 2,935181411 | 2,489204978 | 1,947857357 | 3,047313553 | 2,117231915 | 0,687907314 | 1,67610419  | 4,982433727 | 0,891435848 | 4,238618524 | 3,471667997 |
| Aureobasidium      | 0,460829493 | 0,923675255 | 0,571428571 | 1,426872771 | 0,224215247 | 0,292100584 | 0,569373689 | 0,300721732 | 0,470495981 | 0,108616944 | 0,279350698 | 0,127754711 | 0,397962432 | 0,412087912 | 0,359138069 |
| Candida            | 0,921658986 | 0,777831794 | 0,428571429 | 1,664684899 | 4,443538524 | 0,571501143 | 0,149835181 | 1,864474739 | 0,352871986 | 1,593048516 | 1,381653454 | 0,606834877 | 3,311047437 | 2,06043956  | 0,399042298 |
| Chaetomella        | 1,900921659 | 0,097228974 | 0           | 0           | 0,020383204 | 0           | 0           | 0           | 0           | 0,072411296 | 0,007550019 | 0           | 0,015918497 | 0           | 0           |
| Cladosporium       | 7,02764977  | 8,26446281  | 8,5         | 9,750297265 | 4,891969018 | 4,152908306 | 4,465088403 | 3,869286287 | 4,332483827 | 2,353367125 | 5,790864477 | 2,906419674 | 3,215536453 | 3,198587127 | 4,269752594 |
| Colletotrichum     | 2,880184332 | 5,05590666  | 6,357142857 | 5,469678954 | 5,707297187 | 2,311404623 | 1,618219958 | 3,287890938 | 2,195647912 | 2,136133237 | 1,27595319  | 2,746726286 | 1,671442216 | 3,375196232 | 7,82122905  |
| Didymella          | 9,735023041 | 6,174039864 | 9,357142857 | 3,567181926 | 6,15572768  | 3,314706629 | 4,075516931 | 3,408179631 | 5,077435797 | 33,20057929 | 0,989052473 | 3,481315874 | 2,148997135 | 3,296703297 | 4,588986433 |
| Fusarium           | 3,571428571 | 0,972289742 | 2,571428571 | 1,070154578 | 1,161842642 | 1,371602743 | 0,389571471 | 2,205292702 | 2,195647912 | 7,784214337 | 1,019252548 | 1,117853721 | 2,849411016 | 1,962323391 | 4,509177973 |
| Glomerella         | 1,728110599 | 2,139037433 | 1,928571429 | 0,951248514 | 1,691805952 | 0,93980188  | 1,798022176 | 1,06255012  | 1,195843952 | 3,548153512 | 0,792751982 | 1,181731076 | 0,986946832 | 4,297488226 | 3,431763767 |
| Kazachstania       | 0,576036866 | 0,631988333 | 0,428571429 | 1,783590963 | 0,631879331 | 15,13843028 | 1,138747378 | 1,042502005 | 2,156439914 | 1,158580739 | 10,19252548 | 1,022037688 | 2,180834129 | 0,686813187 | 0,478850758 |
| Kodamaea           | 0,17281106  | 0           | 0,928571429 | 0           | 2,833265389 | 0,787401575 | 0,599340725 | 0,501202887 | 0,019603999 | 0,18102824  | 0           | 0,031938678 | 0           | 0           | 0,997605746 |
| Penicillium        | 0,633640553 | 1,409820126 | 0,428571429 | 0,237812128 | 1,121076233 | 0,139700279 | 0,179802218 | 0,641539695 | 0,294059988 | 0,687907314 | 0,015100038 | 0,095816033 | 0           | 0,35321821  | 0,159616919 |
| Pestalotiopsis     | 0,230414747 | 0,194457948 | 0,214285714 | 0,118906064 | 0,67264574  | 0,228600457 | 0,389571471 | 0,521251002 | 0,274455989 | 0,615496017 | 0           | 0,542957522 | 0,206940465 | 1,766091052 | 0,678371907 |
| Saccharomyces      | 0,057603687 | 0,097228974 | 0           | 0,118906064 | 0,040766408 | 0,038100076 | 0,059934073 | 0,140336808 | 0,156831994 | 0,072411296 | 0,249150623 | 0,894282977 | 0,238777459 | 0,941915228 | 1,037509976 |
| Strelitziana       | 0,576036866 | 0,097228974 | 0,5         | 1,070154578 | 2,833265389 | 0,431800864 | 0,119868145 | 0,781876504 | 0,294059988 | 0,253439537 | 0,347300868 | 0,031938678 | 0,334288443 | 0,824175824 | 0,03990423  |
| Torulaspora        | 1,843317972 | 1,215362178 | 0,642857143 | 3,68608799  | 1,386057888 | 16,39573279 | 2,637099191 | 1,764234162 | 3,352283866 | 1,556842867 | 16,69309173 | 2,044075375 | 2,626552053 | 1,157770801 | 0,199521149 |
| unidentified       | 4,320276498 | 4,958677686 | 3,214285714 | 6,896551724 | 2,772115777 | 1,765303531 | 3,775846569 | 4,711307137 | 4,959811802 | 2,353367125 | 5,269913175 | 3,321622485 | 2,722063037 | 3,335949765 | 1,835594573 |
| Wickerhamomyces    | 0,34562212  | 0,048614487 | 0,214285714 | 1,307966706 | 0           | 0,457200914 | 0,059934073 | 0,080192462 | 0,725347971 | 0,144822592 | 0,27180068  | 0           | 0,095510984 | 0,667189953 | 0           |
| Other              | 16,30184332 | 19,6402528  | 13          | 21,52199762 | 18,263351   | 16,5481331  | 17,86035361 | 16,13873296 | 10,21368359 | 11,07892831 | 12,7595319  | 17,88565953 | 24,03693091 | 14,14835165 | 11,93136472 |
| Agaricaceae        | 0           | 0           | 0           | 0           | 0           | 0           | 0           | 0           | 0           | 0           | 0           | 0,031938678 | 0           | 0           | 0           |

|                     |             |             |             |             |             |             |             |             |             |             |             |             |             |             |             |
|---------------------|-------------|-------------|-------------|-------------|-------------|-------------|-------------|-------------|-------------|-------------|-------------|-------------|-------------|-------------|-------------|
| Amphisphaeriaceae   | 0           | 0           | 0,071428571 | 0           | 0           | 0           | 0           | 0           | 0           | 0           | 0           | 0           | 0           | 0           | 0           |
| Bionectriaceae      | 0           | 0           | 0           | 0           | 0           | 0           | 0,059934073 | 0           | 0           | 0           | 0           | 0           | 0           | 0           | 0           |
| Botryosphaeriaceae  | 0           | 0           | 0           | 0,237812128 | 0           | 0           | 0           | 0           | 0           | 0           | 0           | 0           | 0           | 0           | 0           |
| Chaetomiaceae       | 0           | 0           | 0           | 0           | 0           | 0           | 0           | 0           | 0           | 0           | 0           | 0,063877355 | 0           | 0           | 0           |
| Diaporthaceae       | 0           | 0           | 0,071428571 | 0           | 0           | 0           | 0           | 0           | 0           | 0           | 0           | 0           | 0           | 0           | 0           |
| Dothioraceae        | 0           | 0           | 0           | 0           | 0           | 0           | 0           | 0           | 0           | 0           | 0           | 0           | 0,015918497 | 0           | 0           |
| Glomerellaceae      | 0           | 0           | 0,071428571 | 0           | 0           | 0           | 0           | 0,080192462 | 0           | 0           | 0           | 0           | 0           | 0           | 0           |
| Herpotrichiellaceae | 0           | 0           | 0           | 0           | 0           | 0           | 0           | 0           | 0           | 0           | 0,007550019 | 0           | 0           | 0           | 0           |
| Lophiostomataceae   | 0           | 0           | 0           | 0           | 0           | 0,012700025 | 0           | 0           | 0           | 0           | 0           | 0           | 0           | 0           | 0           |
| Pezizomycotina      | 0           | 0           | 0           | 0           | 0           | 0           | 0,089901109 | 0           | 0           | 0           | 0           | 0           | 0           | 0,039246468 | 0           |
| Pleosporales        | 0           | 0,097228974 | 0           | 0,118906064 | 0,244598451 | 0,050800102 | 0,059934073 | 0,100240577 | 0,039207998 | 0,108616944 | 0           | 0           | 0           | 0,019623234 | 0           |
| Saccharomycetaceae  | 0           | 0           | 0           | 0           | 0           | 0,203200406 | 0           | 0           | 0,235247991 | 0           | 0,868252171 | 0,223570744 | 0,222858962 | 0           | 0           |
| Saccharomycetales   | 0,057603687 | 0           | 0           | 0           | 0           | 0           | 0,179802218 | 0           | 0,235247991 | 0           | 0,113250283 | 0           | 0,015918497 | 0           | 0           |
| Sporormiaceae       | 0           | 0           | 0           | 0           | 0           | 0           | 0           | 0           | 0           | 0           | 0           | 0           | 0           | 0           | 0,03990423  |
| Teratosphaeriaceae  | 0           | 0           | 0           | 0           | 0           | 0           | 0,029967036 | 0           | 0,019603999 | 0           | 0           | 0           | 0           | 0           | 0           |
| Trichocomaceae      | 0,17281106  | 0           | 0,071428571 | 0,118906064 | 0,020383204 | 0           | 0,029967036 | 0,060144346 | 0           | 0,108616944 | 0           | 0           | 0           | 0,039246468 | 0           |
| Valsaceae           | 0           | 0           | 0           | 0           | 0           | 0           | 0,149835181 | 0           | 0,235247991 | 0           | 0           | 0,766528266 | 0,620821394 | 0,078492936 | 0,758180367 |
| Acremonium          | 0           | 0           | 0           | 0           | 0           | 0           | 0,179802218 | 0           | 0           | 0           | 0           | 0           | 0           | 0           | 0           |
| Apiotrichum         | 0,288018433 | 0,097228974 | 0           | 0,356718193 | 0,061149613 | 0,063500127 | 0,029967036 | 0,040096231 | 0,117623995 | 0,036205648 | 0,052850132 | 0           | 0,143266476 | 0,274725275 | 0,159616919 |
| Arnium              | 0           | 0           | 0,071428571 | 0           | 0           | 0           | 0           | 0           | 0           | 0           | 0           | 0           | 0           | 0           | 0           |
| Aspergillus         | 0,115207373 | 0,194457948 | 0,214285714 | 0,475624257 | 0,285364859 | 0,076200152 | 0,539406653 | 0,020048115 | 0,411683984 | 0,072411296 | 0           | 0,734589588 | 0,875517351 | 0,058869702 | 0,319233839 |
| Beauveria           | 0,057603687 | 0           | 0           | 0           | 0           | 0           | 0,029967036 | 0,100240577 | 0           | 0           | 0           | 0           | 0           | 0,039246468 | 0           |
| Bipolaris           | 0,403225806 | 0,048614487 | 0           | 0,237812128 | 0,14268243  | 0,127000254 | 0,119868145 | 0,120288693 | 0           | 0,434467777 | 0           | 0           | 0,493473416 | 0,470957614 | 0,11971269  |

|                     |             |             |             |             |             |             |             |             |             |             |             |             |             |             |             |
|---------------------|-------------|-------------|-------------|-------------|-------------|-------------|-------------|-------------|-------------|-------------|-------------|-------------|-------------|-------------|-------------|
| Buckleyzyma         | 0           | 0           | 0           | 0           | 0           | 0,088900178 | 0           | 0           | 0,058811998 | 0           | 0           | 0           | 0           | 0           | 0           |
| Bullera             | 0           | 0,145843461 | 0,071428571 | 0,118906064 | 0           | 0           | 0           | 0           | 0           | 0           | 0,354850887 | 0           | 0           | 0           | 0           |
| Cercospora          | 0           | 0           | 0           | 0           | 0           | 0,012700025 | 0           | 0           | 0           | 0           | 0           | 0           | 0           | 0,039246468 | 0           |
| Chaetomium          | 0           | 0           | 0,142857143 | 0           | 0,020383204 | 0           | 0           | 0           | 0,019603999 | 0           | 0           | 0           | 0,015918497 | 0           | 0           |
| Coprinellus         | 0           | 0           | 0,214285714 | 0           | 0           | 0           | 0           | 0           | 0           | 0           | 0           | 0           | 0           | 0           | 0,07980846  |
| Curvularia          | 0,115207373 | 0           | 0           | 0           | 0           | 0           | 0           | 0           | 0           | 0           | 0           | 0           | 0           | 0,019623234 | 0           |
| Cutaneotrichosporon | 0           | 0           | 0,785714286 | 0,951248514 | 0           | 0,050800102 | 0,329637399 | 0           | 0,156831994 | 0,036205648 | 0,234050585 | 0           | 0           | 0           | 0,598563448 |
| Diaporthe           | 0           | 0           | 0,071428571 | 0           | 0           | 0,012700025 | 0           | 0,300721732 | 0           | 0,108616944 | 0           | 0           | 0           | 0,058869702 | 0           |
| Dioszegia           | 0           | 0           | 0           | 0           | 0           | 0,355600711 | 0           | 0           | 0           | 0           | 0,007550019 | 0           | 0           | 0           | 0           |
| Diplodia            | 0           | 0           | 0           | 0           | 0           | 0           | 0           | 0           | 0           | 0           | 0           | 0           | 0           | 0           | 0,03990423  |
| Dothiorella         | 0           | 0           | 0           | 0,356718193 | 0           | 0           | 0           | 0           | 0           | 0           | 0           | 0           | 0           | 0           | 0           |
| Endomelanconiopsis  | 0           | 0           | 0           | 0           | 0           | 0,012700025 | 0           | 0           | 0           | 0           | 0           | 0           | 0           | 0           | 0           |
| Exophiala           | 0           | 0           | 0           | 0           | 0           | 0           | 0           | 0           | 0           | 0           | 0           | 0           | 0           | 0,196232339 | 0           |
| Filobasidium        | 0           | 0           | 0           | 0           | 0           | 0           | 0           | 0           | 0,019603999 | 0           | 0           | 0           | 0           | 0           | 0           |
| Geosmithia          | 0           | 0           | 0           | 0           | 0           | 0           | 0           | 0           | 0           | 0           | 0           | 0           | 0,015918497 | 0           | 0           |
| Hannaella           | 0,576036866 | 0,437530384 | 0           | 0,118906064 | 0           | 0,063500127 | 0           | 0           | 0,019603999 | 0           | 0,302000755 | 0           | 0           | 0           | 0           |
| Hanseniaspora       | 0,17281106  | 0,194457948 | 0           | 0,118906064 | 0,122299225 | 0,33020066  | 0,299670363 | 0,40096231  | 0,156831994 | 0,108616944 | 0,347300868 | 0,095816033 | 0,477554919 | 0,058869702 | 0,239425379 |
| Heterogastrium      | 0           | 0           | 0           | 0           | 0           | 0           | 0           | 0           | 0           | 0           | 0,052850132 | 0           | 0           | 0           | 0           |
| Isaria              | 0           | 0           | 0,071428571 | 0           | 0           | 0           | 0           | 0           | 0,117623995 | 0,036205648 | 0           | 0           | 0           | 0           | 0           |
| Issatchenkia        | 0,8640553   | 0,048614487 | 0,857142857 | 0,237812128 | 0           | 0,177800356 | 0,119868145 | 0           | 0           | 0           | 0,226500566 | 0           | 0,191021968 | 0           | 0,159616919 |
| Kluyveromyces       | 0           | 0           | 0           | 0           | 0           | 0           | 0           | 0,040096231 | 0           | 0           | 0           | 0           | 0           | 0           | 0           |
| Kwoniella           | 0           | 0,145843461 | 0           | 0           | 0,264981655 | 0           | 0,179802218 | 0           | 0           | 0           | 0,030200076 | 0,191632066 | 0           | 0           | 0           |
| Meira               | 0,288018433 | 0,777831794 | 0,071428571 | 0,356718193 | 0,346514472 | 0,419100838 | 0,149835181 | 0           | 0,215643991 | 0,217233888 | 0,143450359 | 0,063877355 | 0,366125438 | 0,431711146 | 0,798084597 |



|                  |             |             |             |             |             |             |             |             |             |             |             |             |             |             |             |
|------------------|-------------|-------------|-------------|-------------|-------------|-------------|-------------|-------------|-------------|-------------|-------------|-------------|-------------|-------------|-------------|
| Meyerozyma       | 0,17281106  | 0,194457948 | 0,357142857 | 0,951248514 | 0,101916021 | 0,381000762 | 0,059934073 | 0,100240577 | 0,235247991 | 0,217233888 | 0,27180068  | 0,127754711 | 0,095510984 | 0,706436421 | 0           |
| Microdochium     | 0           | 0           | 0           | 0           | 0           | 0           | 0           | 0           | 0           | 0           | 0,007550019 | 0           | 0           | 0           | 0           |
| Mortierella      | 0,230414747 | 0           | 0           | 0,237812128 | 0,020383204 | 0           | 0           | 0,020048115 | 0           | 0           | 0           | 0,031938678 | 0,015918497 | 0,019623234 | 0           |
| Mucor            | 0           | 0           | 0           | 0           | 0           | 0,609601219 | 0           | 0,120288693 | 0           | 0           | 0,279350698 | 0           | 0           | 0           | 0           |
| Nigrospora       | 0           | 0           | 0,071428571 | 0           | 0,163065634 | 0           | 0           | 0           | 0           | 0           | 0           | 0           | 0           | 0,019623234 | 0           |
| Ochroconis       | 0,17281106  | 0,145843461 | 0,428571429 | 0           | 0,407664085 | 0,063500127 | 0,059934073 | 0,040096231 | 0,098019996 | 0           | 0           | 0           | 0,079592486 | 0           | 0           |
| Periconia        | 0           | 0           | 0           | 0           | 0           | 0,203200406 | 0           | 0           | 0           | 0           | 0           | 0           | 0           | 0           | 0           |
| Pichia           | 0           | 0,145843461 | 0           | 0,356718193 | 0           | 0           | 0           | 0           | 0,019603999 | 0           | 0,211400529 | 0           | 0           | 0           | 0           |
| Purpureocillium  | 0           | 0           | 0           | 0           | 0           | 0,076200152 | 0           | 0           | 0,019603999 | 0           | 0           | 0           | 0           | 0           | 0           |
| Rhizopus         | 0           | 0           | 0           | 0           | 0           | 0           | 0           | 0           | 0           | 0           | 0           | 0           | 0,015918497 | 0           | 0           |
| Rhodosporiobolus | 0           | 0           | 0           | 0           | 0           | 0           | 0           | 0           | 0           | 0           | 0           | 0           | 0,015918497 | 0,412087912 | 0,319233839 |
| Rhodotorula      | 0           | 0           | 0           | 0           | 0           | 0           | 0,029967036 | 0           | 0,019603999 | 0,072411296 | 0           | 0,127754711 | 0           | 0           | 0           |
| Rhynchogastrema  | 0           | 0           | 0,214285714 | 0,237812128 | 0           | 0           | 0,089901109 | 0           | 0,137227995 | 0           | 0,015100038 | 0           | 0           | 0           | 0           |
| Saccharomycopsis | 0           | 0           | 0           | 0           | 0           | 0           | 0           | 0           | 0           | 0           | 0           | 0           | 0,143266476 | 0           | 0           |
| Saturnispora     | 0           | 0           | 0           | 0           | 0           | 0,368300737 | 0           | 0           | 0           | 0           | 0           | 0           | 0           | 0           | 0           |
| Sporobolomyces   | 0           | 0,048614487 | 0           | 0           | 0           | 0           | 0           | 0,040096231 | 0           | 0           | 0           | 0           | 0           | 0,196232339 | 0           |
| Stagonosporopsis | 0           | 0           | 0           | 0,118906064 | 0,122299225 | 0,025400051 | 0,029967036 | 0,100240577 | 0           | 0           | 0           | 0           | 0           | 0           | 0           |
| Starmerella      | 0,921658986 | 0,194457948 | 0           | 0           | 0           | 0           | 0,329637399 | 0           | 0           | 0           | 0           | 1,053976365 | 0           | 0           | 0           |
| Sterigmatomyces  | 0           | 0           | 0           | 0           | 0           | 0           | 0           | 0           | 0           | 0,036205648 | 0           | 0           | 0           | 0           | 0           |
| Talaromyces      | 0,057603687 | 0           | 0           | 0           | 0           | 0           | 0           | 0           | 0           | 0           | 0,007550019 | 0           | 0           | 0           | 0           |
| Trichoderma      | 0           | 0           | 0           | 0           | 0           | 0           | 0           | 0           | 0           | 0           | 0           | 0           | 0,015918497 | 0           | 0           |
| Trichosporon     | 0           | 0,048614487 | 0           | 0           | 0,020383204 | 0           | 0           | 0           | 0           | 0           | 0,007550019 | 0           | 0           | 0           | 0           |

**Table S2:** Statistical analysis of glucose consumption

| Glucose |      |      |      |      |      |      |      |      |      |      |      |   |
|---------|------|------|------|------|------|------|------|------|------|------|------|---|
| Samples | A    | B    | C    | D    | E    | F    | G    | H    | I    | J    | K    | L |
| T72     | **** |      |      |      |      |      |      |      |      |      |      |   |
| T60     | **** | **** |      |      |      |      |      |      |      |      |      |   |
| M60     | **** | **** |      |      |      |      |      |      |      |      |      |   |
| M72     | **** | **** |      |      |      |      |      |      |      |      |      |   |
| T48     | **** | **** | **** |      |      |      |      |      |      |      |      |   |
| M48     | **** | **** | **** |      |      |      |      |      |      |      |      |   |
| T36     | **** | **** | **** | **** |      |      |      |      |      |      |      |   |
| T30     | **** | **** | **** | **** | **** |      |      |      |      |      |      |   |
| M36     | **** | **** | **** | **** | **** | **** |      |      |      |      |      |   |
| M30     | **** | **** | **** | **** | **** | **** | **** |      |      |      |      |   |
| T24     |      | **** | **** | **** | **** | **** | **** | **** |      |      |      |   |
| T0      |      | **** | **** | **** | **** | **** | **** | **** |      |      |      |   |
| T18     |      |      | **** | **** | **** | **** | **** | **** | **** |      |      |   |
| M24     |      |      | **** | **** | **** | **** | **** | **** | **** |      |      |   |
| T12     |      |      | **** | **** | **** | **** | **** | **** | **** |      |      |   |
| B48     |      |      |      | **** | **** | **** | **** | **** | **** |      |      |   |
| B60     |      |      |      |      | **** | **** | **** | **** | **** |      |      |   |
| T60     |      |      |      |      | **** | **** | **** | **** | **** |      |      |   |
| B72     |      |      |      |      | **** | **** | **** | **** | **** |      |      |   |
| M18     |      |      |      |      | **** | **** | **** | **** | **** |      |      |   |
| B30     |      |      |      |      |      | **** | **** | **** | **** |      |      |   |
| B24     |      |      |      |      |      |      | **** | **** | **** |      |      |   |
| B36     |      |      |      |      |      |      |      | **** | **** | **** |      |   |
| M6      |      |      |      |      |      |      |      |      | **** | **** |      |   |
| M12     |      |      |      |      |      |      |      |      | **** | **** |      |   |
| B18     |      |      |      |      |      |      |      |      |      | **** | **** |   |

|     |  |  |  |  |  |  |  |  |  |  |      |      |
|-----|--|--|--|--|--|--|--|--|--|--|------|------|
| B12 |  |  |  |  |  |  |  |  |  |  | **** | **** |
| B6  |  |  |  |  |  |  |  |  |  |  | **** | **** |
| M0  |  |  |  |  |  |  |  |  |  |  | **** | **** |
| B0  |  |  |  |  |  |  |  |  |  |  |      | **** |

**Table S3:** Statistical analysis of fructose consumption

| Fructose |      |      |      |      |      |      |      |      |      |   |  |
|----------|------|------|------|------|------|------|------|------|------|---|--|
| Samples  | A    | B    | C    | D    | E    | F    | G    | H    | I    | J |  |
| T72      | **** |      |      |      |      |      |      |      |      |   |  |
| T60      | **** | **** |      |      |      |      |      |      |      |   |  |
| T36      | **** | **** | **** |      |      |      |      |      |      |   |  |
| T24      |      | **** | **** |      |      |      |      |      |      |   |  |
| T30      |      |      | **** |      |      |      |      |      |      |   |  |
| T48      |      |      | **** | **** |      |      |      |      |      |   |  |
| M60      |      |      | **** | **** |      |      |      |      |      |   |  |
| T0       |      |      | **** | **** |      |      |      |      |      |   |  |
| M48      |      |      | **** | **** | **** |      |      |      |      |   |  |
| M30      |      |      | **** | **** | **** |      |      |      |      |   |  |
| T12      |      |      | **** | **** | **** |      |      |      |      |   |  |
| T18      |      |      | **** | **** | **** |      |      |      |      |   |  |
| M72      |      |      | **** | **** | **** |      |      |      |      |   |  |
| M36      |      |      | **** | **** | **** |      |      |      |      |   |  |
| M24      |      |      |      | **** | **** | **** |      |      |      |   |  |
| T60      |      |      |      |      | **** | **** | **** |      |      |   |  |
| M18      |      |      |      |      |      | **** | **** |      |      |   |  |
| M12      |      |      |      |      |      |      | **** | **** |      |   |  |
| B30      |      |      |      |      |      |      | **** | **** | **** |   |  |

|     |  |  |  |  |  |  |      |      |      |      |
|-----|--|--|--|--|--|--|------|------|------|------|
| B48 |  |  |  |  |  |  | **** | **** | **** |      |
| M0  |  |  |  |  |  |  | **** | **** | **** |      |
| B24 |  |  |  |  |  |  | **** | **** | **** |      |
| B60 |  |  |  |  |  |  |      | **** | **** | **** |
| B36 |  |  |  |  |  |  |      | **** | **** | **** |
| M6  |  |  |  |  |  |  |      | **** | **** | **** |
| B72 |  |  |  |  |  |  |      | **** | **** | **** |
| B18 |  |  |  |  |  |  |      |      | **** | **** |
| B60 |  |  |  |  |  |  |      |      |      | **** |
| B12 |  |  |  |  |  |  |      |      |      | **** |
| B0  |  |  |  |  |  |  |      |      |      | **** |

**Table S4:** Statistical analysis of lactic acid production

| Lactic Acid |      |      |      |      |      |      |      |      |   |   |   |   |   |   |
|-------------|------|------|------|------|------|------|------|------|---|---|---|---|---|---|
| Sample      | A    | B    | C    | D    | E    | F    | G    | H    | I | J | K | L | M | N |
| T6          | **** |      |      |      |      |      |      |      |   |   |   |   |   |   |
| M6          | **** | **** |      |      |      |      |      |      |   |   |   |   |   |   |
| T12         | **** | **** |      |      |      |      |      |      |   |   |   |   |   |   |
| B6          | **** | **** | **** |      |      |      |      |      |   |   |   |   |   |   |
| M12         | **** | **** | **** | **** |      |      |      |      |   |   |   |   |   |   |
| B12         |      | **** | **** | **** |      |      |      |      |   |   |   |   |   |   |
| T24         |      | **** | **** | **** | **** |      |      |      |   |   |   |   |   |   |
| T18         |      |      | **** | **** | **** | **** |      |      |   |   |   |   |   |   |
| T30         |      |      |      | **** | **** | **** |      |      |   |   |   |   |   |   |
| T36         |      |      |      | **** | **** | **** |      |      |   |   |   |   |   |   |
| M18         |      |      |      |      | **** | **** | **** |      |   |   |   |   |   |   |
| M24         |      |      |      |      |      | **** | **** | **** |   |   |   |   |   |   |

|     |  |  |  |  |  |  |      |      |      |      |      |      |      |      |
|-----|--|--|--|--|--|--|------|------|------|------|------|------|------|------|
| T60 |  |  |  |  |  |  | **** | **** | **** |      |      |      |      |      |
| B18 |  |  |  |  |  |  | **** | **** | **** |      |      |      |      |      |
| B24 |  |  |  |  |  |  | **** | **** | **** |      |      |      |      |      |
| T48 |  |  |  |  |  |  | **** | **** | **** |      |      |      |      |      |
| M30 |  |  |  |  |  |  | **** | **** | **** |      |      |      |      |      |
| T72 |  |  |  |  |  |  | **** | **** | **** | **** |      |      |      |      |
| M36 |  |  |  |  |  |  |      | **** | **** | **** | **** |      |      |      |
| B30 |  |  |  |  |  |  |      |      | **** | **** | **** |      |      |      |
| B36 |  |  |  |  |  |  |      |      |      | **** | **** | **** |      |      |
| M48 |  |  |  |  |  |  |      |      |      |      | **** | **** |      |      |
| B48 |  |  |  |  |  |  |      |      |      |      |      | **** |      |      |
| M60 |  |  |  |  |  |  |      |      |      |      |      | **** |      |      |
| B60 |  |  |  |  |  |  |      |      |      |      |      |      | **** |      |
| M72 |  |  |  |  |  |  |      |      |      |      |      |      | **** | **** |
| B72 |  |  |  |  |  |  |      |      |      |      |      |      |      | **** |

Table S5: Statistical analysis of acetic acid production

| Acetic acid |      |      |      |      |   |   |   |   |   |   |
|-------------|------|------|------|------|---|---|---|---|---|---|
| Samples     | A    | B    | C    | D    | E | F | G | H | I | J |
| T24         | **** |      |      |      |   |   |   |   |   |   |
| T18         | **** |      |      |      |   |   |   |   |   |   |
| M18         | **** | **** |      |      |   |   |   |   |   |   |
| T30         | **** | **** |      |      |   |   |   |   |   |   |
| B18         | **** | **** |      |      |   |   |   |   |   |   |
| T36         | **** | **** |      |      |   |   |   |   |   |   |
| M24         | **** | **** | **** |      |   |   |   |   |   |   |
| T60         |      | **** | **** | **** |   |   |   |   |   |   |



**Table S6:** Statistical analysis of volatile compounds detected in the liquid fraction from fermentation of Brazilian coffee beans

| Compounds                   | 0 h          |                 |                 | 12 h             |                 |                 | 24 h             |                 |                 | 48 h             |                 |                  | 72 h            |                  |                |
|-----------------------------|--------------|-----------------|-----------------|------------------|-----------------|-----------------|------------------|-----------------|-----------------|------------------|-----------------|------------------|-----------------|------------------|----------------|
|                             | Top          | Middle          | Bottom          | Top              | Middle          | Bottom          | Top              | Middle          | Bottom          | Top              | Middle          | Bottom           | Top             | Middle           | Bottom         |
| <i>Higher alcohols</i>      |              |                 |                 |                  |                 |                 |                  |                 |                 |                  |                 |                  |                 |                  |                |
| Ethanol                     | 15.62±3.97AB | 15.16 ± 0.83 AB | 18.25 ± 4.07 A  | 10.56 ± 1.05 B   | 16.68 ± 2.75 AB | 20.10 ± 2.13 AC | 16.10 ± 2.07 AB  | 16.76 ± 0.64 AB | 20.53 ± 1.06 AC | 41.05 ± 5.00 E   | 19.87 ± 1.12 A  | 21.44 ± 4.44 AC  | 17.62 ± 1.82 AB | 27.02 ± 1.28 CD  | 33.85 ± 2.63 D |
| Methanol                    | -            | 0.98 ± 0.24 AB  | 0.73 ± 0.00 A   | 0.92 ± 0.14 AB   | 0.99 ± 0.32 AB  | 0.98 ± 0.42AB   | 1.16 ± 0.29AB    | 0.86 ± 0.04 AB  | 1.35 ± 0.09 AB  | 0.91 ± 0.21 AB   | 0.73 ± 0.16 A   | 1.09 ± 0.16 AB   | 0.88 ± 0.24 AB  | 0.96 ± 0.07 AB   | 1.54 ± 0.38 B  |
| 2-Butanol                   | -            | -               | 0.12 ± 0.02 A   | -                | 0.10 ± 0.01     | -               | -                | -               | -               | 0.88 ± 0.10 B    | -               | -                | -               | -                | -              |
| 1-Propanol, 2-methyl        | 0.31±0.18ABC | 0.42 ± 0.16 BCD | 0.57 ± 0.19 CD  | 0.39 ± 0.03 ABCD | 0.67 ± 0.09 D   | 0.66 ± 0.13 D   | 0.22 ± 0.03 AB   | 0.24 ± 0.02 AB  | 0.22 ± 0.05 AB  | 0.13 ± 0.04 A    | 0.28 ± 0.01 ABC | 0.40 ± 0.04 ABCD | 0.23 ± 0.05 AB  | 0.35 ± 0.01 ABC  | 0.56 ± 0.03 CD |
| 1-Butanol, 3-methyl         | 0.40±0.09A   | 0.63 ± 0.12 AB  | 0.77 ± 0.17 ABC | 0.91 ± 0.17 BCD  | 1.21 ± 0.20 CDE | 1.38 ± 0.35 E   | 0.59 ± 0.16 AB   | 0.58 ± 0.06 AB  | 0.64 ± 0.01 AB  | 0.48 ± 0.10 AB   | 0.74 ± 0.06 AB  | 0.83 ± 0.14 ABCD | 0.64 ± 0.11 AB  | 0.92 ± 0.08 BCDE | 1.27 ± 0.12 DE |
| 1-Butanol                   | -            | -               | -               | -                | 0.20 ± 0.01 A   | 0.17 ± 0.11 AB  | -                | -               | -               | -                | 0.12 ± 0.02 B   | 0.13 ± 0.02 B    | 0.11 ± 0.00 B   | 0.17 ± 0.04 AB   | 0.21 ± 0.02 A  |
| 1-Hexanol                   | 0.65±0.05 A  | 0.83 ± 0.11 AB  | 0.66 ± 0.18 A   | 1.08 ± 0.12 AB   | 0.91 ± 0.11 AB  | 1.04 ± 0.01 AB  | 0.87 ± 0.23 AB   | 1.28 ± 0.22 ABC | 1.29 ± 0.16 ABC | 1.26 ± 0.78 ABC  | 2.08 ± 0.04 D   | 1.87 ± 0.06 CD   | 1.57 ± 0.15 BCD | 2.99 ± 0.12 E    | 4.20 ± 0.37 F  |
| 2-Heptanol                  | 1.65±0.55A   | 2.48 ± 0.72 AB  | 3.13 ± 0.26 ABC | 4.35 ± 0.63 BCD  | 4.70 ± 0.71 BCD | 5.58 ± 0.61 CDE | 5.10 ± 1.12 BCDE | 6.46 ± 0.25 DE  | 7.49 ± 0.54 E   | 6.24 ± 1.51 DE   | 10.86 ± 0.24 F  | 11.49 ± 2.00 F   | 7.5 ± 0.64 E    | 12.71 ± 0.50 F   | 20.08 ± 0.91 G |
| 3-Ethyl-4-methylpentan-1-ol | 0.36±0.05A   | 0.49 ± 0.04 AB  | 0.56 ± 0.14 ABC | 0.90 ± 0.10 BCD  | 0.84 ± 0.12 BCD | 0.92 ± 0.03 BCD | 0.79 ± 0.19 ABCD | 0.94 ± 0.06 BCD | 1.28 ± 0.07 CDE | 0.80 ± 0.13 ABCD | 1.47 ± 0.05 E   | 1.25 ± 0.39 DE   | 1.10 ± 0.25 DE  | 1.95 ± 0.09 F    | 2.47 ± 0.19 G  |
| Benzyl alcohol              | -            | 0.32 ± 0.01 A   | 0.32 ± 0.06 A   | 0.32 ± 0.08 A    | 0.39 ± 0.02 A   | 0.54 ± 0.11 A   | -                | 0.33 ± 0.00 A   | 0.47 ± 0.07 A   | 0.47 ± 0.06 A    | 1.34 ± 0.21 B   | 1.08 ± 0.12 B    | 1.00 ± 0.06 B   | 2.51 ± 0.20 C    | 3.45 ± 0.23 D  |
| Phenylethyl Alcohol         | -            | 0.38 ± 0.05 AB  | 0.48 ± 0.08     | 0.71 ± 0.07 ABC  | 1.03 ± 0.01     | 1.22 ± 0.07 BCD | 0.20 ± 0.05 A    | 0.67 ± 0.14 ABC | 1.25 ± 0.06 CD  | 1.07 ± 0.16 BCD  | 4.12 ± 0.08 E   | 3.05 ± 0.60 F    | 1.58 ± 0.16 D   | 6.60 ± 0.27 G    | 9.88 ± 0.74 H  |

[illegible]



|                                  |              |                |               |                  |                  |                 |                 |                 |                |                 |                |                  |                  |                 |                 |
|----------------------------------|--------------|----------------|---------------|------------------|------------------|-----------------|-----------------|-----------------|----------------|-----------------|----------------|------------------|------------------|-----------------|-----------------|
| Acetoin                          | 0.42±0.04A   | 0.26 ± 0.17 A  | 0.73 ± 0.10 B | -                | -                | -               | -               | -               | -              | -               | -              | -                | -                | -               | -               |
| 2-Heptanone                      | 0.52±0.10A   | 0.19 ± 0.04 B  | 0.38 ± 0.02 A | -                | -                | -               |                 |                 |                |                 |                |                  |                  |                 |                 |
| 2-Butanone                       | -            | -              | -             | -                | -                | -               | -               | -               | -              | -               | -              | -                | -                | -               | -               |
| beta.-Damascenone                | -            | -              | 0.35 ± 0.05 A | -                | -                | -               | -               | -               | -              | 0.50 ± 0.06 AB  | 0.98 ± 0.16 C  | 0.85 ± 0.14 BC   | 0.96 ± 0.02 BC   | 2.79 ± 0.27 D   | 2.78 ± 0.27 D   |
| <b>Esters</b>                    |              |                |               |                  |                  |                 |                 |                 |                |                 |                |                  |                  |                 |                 |
| Methyl acetate                   | 0.27±0.01AB  | 0.18 ± 0.04 A  | 0.23 ± 0.02 A | 0.51 ± 0.04 ABCD | 0.69 ± 0.03 BCDE | 0.84 ± 0.14 DE  | 1.05 ± 0.13 EFG | 1.46 ± 0.20 GH  | 1.79 ± 0.27 H  | 0.39 ± 0.13 ABC | 1.32 ± 0.33 FG | 1.01 ± 0.08 EF   | 0.55 ± 0.02 ABCD | 0.72 ± 0.02 CDE | 1.00 ± 0.12 EF  |
| Ethyl Acetate                    | 3.04±1.64ABC | 2.16 ± 0.21 AB | 1.69 ± 0.28 A | 2.94 ± 0.66 ABC  | 4.80 ± 0.84 BCD  | 3.86 ± 0.85 ABC | 7.69 ± 0.29 EF  | 7.44 ± 0.85 DEF | 8.19 ± 0.31 F  | 16.39 ± 2.03 G  | 8.16 ± 1.04 F  | 5.65 ± 0.95 CDEF | 18.37 ± 1.45 BC  | 4.50 ± 0.25 BC  | 5.02 ± 0.22 CDE |
| 1-Butanol, 3-methyl-, acetate    | -            | -              | -             | -                | -                | -               | -               | 0.28 ± 0.06 A   | 0.35 ± 0.04 BC | 0.39 ± 0.14 ABC | 0.52 ± 0.07 BC | 0.49 ± 0.11 ABC  | 0.33 ± 0.07 AB   | 0.41 ± 0.06 ABC | 0.59 ± 0.47 C   |
| Acetic acid, 2-phenylethyl ester | -            | -              | -             | -                | -                | -               | -               | -               | -              | 0.47 ± 0.25 A   | 0.65 ± 0.05 A  | 0.55 ± 0.16 A    | 0.45 ± 0.09 A    | 1.24 ± 0.10 B   | 1.45 ± 0.15 B   |
| Acetic acid, phenylmethyl ester  |              |                |               |                  |                  |                 |                 |                 |                |                 |                |                  | 0.33 ± 0.06 A    | 0.64 ± 0.03 B   | 0.79 ± 0.01 C   |
| Capric acid, ethyl ester         | -            | -              | -             | -                | -                | -               | -               |                 | -              | 0.38 ± 0.10     | -              | -                |                  |                 |                 |
| Isobutyl acetate                 | -            | -              | -             | -                | -                | -               | -               | -               | -              | -               | 0.19 ± 0.00 A  | 0.18 ± 0.02 AB   | 0.07 ± 0.00 C    | 0.10 ± 0.03 C   | 0.12 ± 0.01 BC  |
| Amyl acetate                     | -            | -              | -             | -                | -                | -               | -               | -               | -              | -               | 0.15 ± 0.01 A  | 0.14 ± 0.01 A    | -                | 0.16 ± 0.01     | 0.25 ± 0.03 B   |
| 2-Buten-1-ol, 3-methyl-, acetate | -            | -              | -             | -                | -                | -               | -               | -               | -              | -               | 0.41 ± 0.02 A  | 0.21 ± 0.04 B    | 0.21 ± 0.02 B    | 0.67 ± 0.11 C   | 0.71 ± 0.01 C   |
| Hexyl acetate                    | -            | -              | -             | -                | -                | -               | -               | -               | -              | -               | 0.41 ± 0.03 AB | 0.38 ± 0.15 AB   | 0.22 ± 0.01 A    | 0.51 ± 0.06 B   | 0.75 ± 0.03 C   |
| Formic acid, 2-                  | -            | -              | -             | -                | -                | -               | -               | -               | -              | -               | 0.65 ±         | 0.69 ±           | 0.36 ± 0.00      | 1.26 ±          | 1.52 ± 0.09     |

|                                         |              |                   |                 |                  |                  |                   |                   |                   |                 |                   |                 |                  |                   |                  |                  |
|-----------------------------------------|--------------|-------------------|-----------------|------------------|------------------|-------------------|-------------------|-------------------|-----------------|-------------------|-----------------|------------------|-------------------|------------------|------------------|
| phenylethyl ester                       |              |                   |                 |                  |                  |                   |                   |                   |                 |                   | 0.06 A          | 0.13 A           | B                 | 0.05 C           | D                |
| Benzoic acid, 2-hydroxy-, methyl ester  | -            | -                 | -               | -                | -                | -                 | -                 | -                 | -               | -                 | 1.00 ± 0.07 A   | 0.37 ± 0.02 C    | 1.12 ± 0.28 AB    | 1.48 ± 0.12 B    | 1.07 ± 0.12 AB   |
| Propanoic acid, 2-hydroxy-, ethyl ester | -            | -                 | -               | -                | -                | -                 | -                 | -                 | -               | -                 | -               | -                | -                 | 0.17 ± 0.02      | -                |
| <i>Free fatty acids</i>                 |              |                   |                 |                  |                  |                   |                   |                   |                 |                   |                 |                  |                   |                  |                  |
| Hexadecanoic acid, methyl ester         | 0.79±0.21AB  | 1.03 ± 0.24 ABCD  | 0.92 ± 0.28 ABC | 0.87 ± 0.18 ABC  | 1.09 ± 0.25 ABCD | 1.49 ± 0.08 D     | 1.23 ± 0.12 ABCD  | 1.04 ± 0.07 ABCD  | 1.26 ± 0.11 BCD | 0.98 ± 0.19 ABCD  | 1.35 ± 0.08 CD  | 0.71 ± 0.06 A    | 0.98 ± 0.05 ABCD  | 1.03 ± 0.05 ABCD | 0.91 ± 0.15 ABC  |
| Hexadecanoic acid, ethyl ester          | -            | 5.02 ± 0.94 A     | 2.29 ± 0.70 B   | 2.81 ± 0.32 AB   | 2.75 ± 0.61 AB   | 3.56 ± 0.65 AB    | 2.54 ± 0.30 AB    | 2.13 ± 0.31 B     | 2.44 ± 0.14 B   | 5.10 ± 2.73 B     | 1.83 ± 0.09 B   | 1.15 ± 0.33 B    | 1.28 ± 0.34 B     | 1.09 ± 0.08 B    | 1.06 ± 0.06 B    |
| Tetradecanoic acid, ethyl ester         | 0.40±0.04    | -                 | -               | -                | -                | -                 |                   |                   |                 |                   |                 |                  |                   |                  |                  |
| n-Hexadecanoic acid                     | 4.58±1.49AB  | 6.23 ± 0.75 ABCDE | 4.37 ± 1.11 A   | 5.78 ± 1.01 ABCD | 5.37 ± 1.21 ABC  | 6.53 ± 1.43 ABCDE | 6.99 ± 0.71 ABCDE | 7.56 ± 1.44 ABCDE | 9.21 ± 0.79 EF  | 7.77 ± 1.63 BCDEF | 10.91 ± 0.20 AF | 4.79 ± 0.27 AB   | 6.34 ± 0.77 ABCDE | 8.95 ± 0.70 DEF  | 8.50 ± 1.54 CDEF |
| Tetradecanoic acid                      | -            | 0.37 ± 0.01 AB    | 0.33 ± 0.05 AB  | 0.30 ± 0.05 A    | 0.34 ± 0.02 AB   | 0.42 ± 0.07 AB    | 0.31 ± 0.05 AB    | 0.40 ± 0.07 AB    | 0.46 ± 0.07 ABC | 0.47 ± 0.00 ABCD  | 0.68 ± 0.07 CDE | 0.48 ± 0.05 ABCD | 0.55 ± 0.19 BCDE  | 0.76 ± 0.13 E    | 0.71 ± 0.07 DE   |
| n-Decanoic acid                         | -            | -                 | -               | 0.14 ± 0.03 A    | 0.26 ± 0.04 B    |                   | -                 | 0.17 ± 0.02 B     | 0.22 ± 0.02 BC  |                   |                 |                  |                   |                  |                  |
| <i>Aldehyde</i>                         |              |                   |                 |                  |                  |                   |                   |                   |                 |                   |                 |                  |                   |                  |                  |
| Hexanal                                 | 1.69±0.30A   | 1.65 ± 0.30 A     | 1.96 ± 0.04 A   | 0.85 ± 0.03 CD   | 1.56 ± 0.30 AB   | 1.64 ± 0.04 A     | 1.16 ± 0.11 BC    | 0.72 ± 0.07 CDE   | 0.94 ± 0.13 CD  | 0.91 ± 0.08 CD    | 1.04 ± 0.03 CD  | 0.75 ± 0.05 CDE  | 0.67 ± 0.11 ED    | 0.76 ± 0.10 CDE  | 0.30 ± 0.05 E    |
| Benzaldehyde                            | 2.74±0.45ACD | 2.93 ± 0.07 ABC   | 3.12 ± 0.07 AB  | 2.14 ± 0.02 DEF  | 2.68 ± 0.74 ACD  | 3.68 ± 0.12 A     | 2.28 ± 0.18 CDE   | 1.62 ± 0.21 EFG   | 2.26 ± 0.13 CDE | 1.10 ± 0.19 GH    | 1.58 ± 0.07 EFG | 0.79 ± 0.05 H    | 1.41 ± 0.09 FGH   | 1.46 ± 0.07 FGH  | 1.15 ± 0.22 GH   |
| 2-Octenal                               | 0.35±0.08ACD | 0.39 ± 0.02 ABC   | 0.48 ± 0.08 AB  | 0.44 ± 0.08 AB   | 0.41 ± 0.07 AB   | 0.53 ± 0.09 B     | 0.18 ± 0.01 E     | 0.10 ± 0.00 E     | 0.24 ± 0.01 CDE | 0.16 ± 0.01 E     | 0.19 ± 0.03 DE  | 0.13 ± 0.03 E    | -                 | -                | 0.12 ± 0.02 E    |
| Nonanal                                 | 0.37±0.      | 0.67 ± 0.19       | 0.34 ± 0.01     | 0.21 ±           | 0.33 ± 0.08      | 0.23 ± 0.04       | 0.23 ± 0.02       | 0.12 ± 0.03       | 0.57 ±          | 0.50 ± 0.05       | 0.32 ± 0.05     | 0.26 ±           | 0.15 ± 0.00       | 0.33 ±           | 0.52 ± 0.05      |

[illegible]

|                                 |            |                 |                |                |                |                |                 |                 |                |                |                |                |                |                |                |
|---------------------------------|------------|-----------------|----------------|----------------|----------------|----------------|-----------------|-----------------|----------------|----------------|----------------|----------------|----------------|----------------|----------------|
| Benzoic acid                    | -          | -               | -              | -              | 0.47 ± 0.18    | -              | -               | -               | -              | -              | -              | -              | -              | -              | -              |
| Butanoic acid                   | -          | -               | -              | -              | -              | -              | -               | -               | -              | -              | 0.35 ± 0.04 A  | 0.30 ± 0.10 A  |                | 0.54 ± 0.01 A  |                |
| <b>Terpenes</b>                 | -          | -               | -              | -              | -              | -              | -               | -               | -              | -              | -              | -              | -              | -              | -              |
| Linalool                        | 2.04±0.32A | 3.49 ± 0.43 A   | 3.23 ± 0.42 A  | 6.35 ± 1.23 AB | 7.68 ± 1.37 AB | 10.93 ± 0.39 B | 11.60 ± 2.14 BC | 18.14 ± 0.67 CD | 21.89 ± 1.65 D | 23.73 ± 4.31 D | 35.05 ± 3.24 E | 38.27 ± 5.41 E | 22.42 ± 2.53 D | 37.24 ± 1.02 E | 63.06 ± 2.53 F |
| beta.-Myrcene                   | -          | -               | -              | -              | -              | -              | -               | -               | -              | 0.42 ± 0.07 A  | 0.51 ± 0.02 AB | 0.67 ± 0.10 C  | 0.44 ± 0.03 AB | 0.59 ± 0.03 BC | 0.91 ± 0.02 D  |
| D-Limonene                      | -          | -               | -              | -              | -              | -              | -               | -               | -              | -              |                |                |                |                | 0.81 ± 0.07    |
| alpha.-Terpineol                | -          | -               | -              | -              | -              | -              | -               | -               | -              | -              | 0.57 ± 0.06 A  | 0.50 ± 0.06 A  | 0.48 ± 0.09 A  | 0.24 ± 0.04 B  | 0.49 ± 0.09 A  |
| trans-Linalool oxide (furanoid) | -          | -               | -              | -              | -              | -              | -               | -               | -              | -              | 0.71 ± 0.07 A  | 0.73 ± 0.13 A  | 0.51 ± 0.07 A  | 1.06 ± 0.04 B  | 1.64 ± 0.17 C  |
| <b>Terpenes</b>                 |            |                 |                |                |                |                |                 |                 |                |                |                |                |                |                |                |
| Linalool                        | 2.04±0.32A | 3.49 ± 0.43 A   | 3.23 ± 0.42 A  | 6.35 ± 1.23 AB | 7.68 ± 1.37 AB | 10.93 ± 0.39 B | 11.60 ± 2.14 BC | 18.14 ± 0.67 CD | 21.89 ± 1.65 D | 23.73 ± 4.31 D | 35.05 ± 3.24 E | 38.27 ± 5.41 E | 22.42 ± 2.53 D | 37.24 ± 1.02 E | 63.06 ± 2.53 F |
| beta.-Myrcene                   | -          | -               | -              | -              | -              | -              | -               | -               | -              | 0.42 ± 0.07 A  | 0.51 ± 0.02 AB | 0.67 ± 0.10 C  | 0.44 ± 0.03 AB | 0.59 ± 0.03 BC | 0.91 ± 0.02 D  |
| D-Limonene                      | -          | -               | -              | -              | -              | -              | -               | -               | -              | -              |                |                |                |                | 0.81 ± 0.07    |
| alpha.-Terpineol                | -          | -               | -              | -              | -              | -              | -               | -               | -              | -              | 0.57 ± 0.06 A  | 0.50 ± 0.06 A  | 0.48 ± 0.09 A  | 0.24 ± 0.04 B  | 0.49 ± 0.09 A  |
| trans-Linalool oxide (furanoid) | -          | -               | -              | -              | -              | -              | -               | -               | -              | -              | 0.71 ± 0.07 A  | 0.73 ± 0.13 A  | 0.51 ± 0.07 A  | 1.06 ± 0.04 B  | 1.64 ± 0.17 C  |
| <b>Other</b>                    |            |                 |                |                |                |                |                 |                 |                |                |                |                |                |                |                |
| 3-ethyl-2-methyl, 1,3-Hexadiene | 0.39±0.05A | 0.53 ± 0.02 A   | 0.66 ± 0.23 A  | -              | -              | -              | -               | -               | -              | -              | -              | -              | -              | -              | -              |
| Ethyl 9-hexadecenoate           | 1.37±0.41A | 0.96 ± 0.18 ABC | 0.47 ± 0.07 BC | 0.30 ± 0.02 C  | 0.37 ± 0.07 C  | 0.40 ± 0.08 C  | 0.42 ± 0.05 C   | 0.31 ± 0.03 C   | 0.50 ± 0.12 BC | 1.21 ± 0.64 AB | -              | -              | -              | -              | -              |

|                                 |   |   |   |   |   |   |   |   |   |   |                  |                  |                  |                  |                  |
|---------------------------------|---|---|---|---|---|---|---|---|---|---|------------------|------------------|------------------|------------------|------------------|
| Nerol oxide                     | - | - | - | - | - | - | - | - | - | - | 0.39 ±<br>0.07 A | 0.42 ±<br>0.00 A | 0.27 ± 0.01<br>A | 0.84 ±<br>0.11 B | 0.93 ± 0.11<br>B |
| Benzene, 1-methoxy-<br>4-methyl | - | - | - | - | - | - | - | - | - | - | -                | -                | -                | 0.99 ±<br>0.10 A | 0.88 ± 0.18<br>A |
